# Supplementary material
Source: publisher site journal article supplement (https://www.dovepress.com/article/339032)
Supplement: Supplementary file 1 [file get_supplementary_file.php]

Supplementary Table 1 Clinical information for patients with lung cancer

| ID           | futime | fustat | Age | Gender | Stage      | T   | M  | N  |
|--------------|--------|--------|-----|--------|------------|-----|----|----|
| TCGA-85-6561 | 1224   | 0      | 66  | MALE   | Stage IB   | T2a | M0 | NX |
| TCGA-37-5819 | 103    | 0      | 64  | MALE   | Stage IIIA | T2  | M0 | N2 |
| TCGA-77-8008 | 2639   | 1      | 68  | MALE   | Stage IB   | T2  | M0 | N0 |
| TCGA-56-8083 | 150    | 0      | 56  | MALE   | Stage IB   | T2a | MX | N0 |
| TCGA-J2-8192 | 739    | 0      | 65  | FEMALE | Stage IIA  | T2a | MX | N1 |
| TCGA-91-8499 | 36     | 0      | 76  | FEMALE | Stage IA   | T1b | MX | N0 |
| TCGA-56-A4ZJ | 640    | 0      | 75  | FEMALE | Stage IA   | T1a | M0 | N0 |
| TCGA-53-7624 | 1043   | 1      | 40  | FEMALE | Stage IV   | T2  | M1 | N0 |
| TCGA-55-6986 | 3261   | 0      | 74  | FEMALE | Stage IB   | T2  | M0 | N0 |
| TCGA-38-4632 | 1357   | 1      | 42  | MALE   | Stage IV   | T2  | M1 | N1 |
| TCGA-78-7146 | 173    | 1      | 71  | FEMALE | Stage IIIA | T2  | M0 | N2 |
| TCGA-85-7710 | 42     | 0      | 59  | FEMALE | Stage IA   | T1b | M0 | N0 |
| TCGA-NJ-A4YG | 2261   | 0      | 65  | MALE   | Stage IB   | T2  | M0 | N0 |
| TCGA-77-A5G1 | 4026   | 0      | 75  | MALE   | Stage IIIA | T3  | M0 | N1 |
| TCGA-22-5480 | 2170   | 1      | 66  | FEMALE | Stage IA   | T1b | M0 | N0 |
| TCGA-85-7698 | 952    | 0      | 48  | MALE   | Stage IA   | T1b | M0 | N0 |
| TCGA-63-A5MU |        | 1      | 48  | MALE   | Stage IIB  | T2b | M0 | N1 |
| TCGA-86-8279 | 949    | 0      | 46  | MALE   | Stage IIA  | T2a | M0 | N1 |
| TCGA-34-A5IX | 1031   | 0      | 80  | MALE   | Stage IIB  | T3  | M0 | N0 |
| TCGA-52-7811 | 266    | 1      | 67  | MALE   | Stage IB   | T2  | M0 | N0 |
| TCGA-50-6591 | 119    | 1      | 63  | FEMALE | Stage IV   | T2  | M1 | N0 |
| TCGA-50-5939 | 460    | 1      | 85  | MALE   | Stage IB   | T2  | M0 | N0 |
| TCGA-58-8387 | 403    | 1      | 60  | MALE   | Stage IIA  | T2b | M0 | N0 |
| TCGA-62-8402 | 1498   | 1      | 73  | FEMALE | Stage IIIA | T2  | M0 | N2 |
| TCGA-21-5783 | 2680   | 1      | 76  | MALE   | Stage IB   | T2  | M0 | N0 |
| TCGA-85-A511 | 455    | 1      | 62  | MALE   | Stage IIB  | T2b | M0 | N1 |
| TCGA-94-8035 | 122    | 0      | 64  | MALE   | Stage IIB  | T3  | MX | N0 |
| TCGA-37-4129 | 242    | 0      | 52  | FEMALE | Stage IA   | T1b | M0 | N0 |
| TCGA-77-8153 | 1992   | 0      | 77  | FEMALE | Stage IB   | T2  | M0 | N0 |
| TCGA-NC-A5HG | 1963   | 0      | 59  | MALE   | Stage IIIA | T2  | M0 | N2 |
| TCGA-77-8146 | 3189   | 0      | 72  | MALE   | Stage IA   | T1  | M0 | N0 |
| TCGA-J1-A4AH | 581    | 0      | 70  | MALE   | Stage IIA  | T2b | MX | N0 |
| TCGA-94-7033 | 640    | 0      | 73  | MALE   | Stage IB   | T2  | MX | N0 |
| TCGA-49-4506 | 999    | 1      | 68  | FEMALE | Stage IIB  | T2  | M0 | N1 |
| TCGA-91-6847 | 842    | 0      | 62  | FEMALE | Stage IB   | T2  | MX | N0 |
| TCGA-97-8547 | 657    | 0      | 78  | FEMALE | Stage IIIA | T2a | MX | N2 |
| TCGA-97-7546 | 1285   | 0      | 76  | FEMALE | Stage IA   | T1  | MX | N0 |
| TCGA-66-2787 | 1217   | 0      | 57  | MALE   | Stage IA   | T1  | M0 | N0 |
| TCGA-63-A5MJ | 1824   | 0      | 54  | MALE   | Stage IIB  | T2  | M0 | N1 |
| TCGA-18-3421 | 2645   | 0      | 65  | MALE   | Stage IB   | T2  | M0 | N0 |
| TCGA-73-4659 | 711    | 1      | 66  | MALE   | Stage IIIA | T2  | M0 | N2 |
| TCGA-21-1079 | 965    | 1      | 71  | MALE   | Stage IIIA | T3  | M0 | N0 |
| TCGA-55-A48Y | 630    | 0      | 69  | MALE   | Stage IIA  | T2b | M0 | N0 |
| TCGA-50-5049 | 3094   | 0      | 70  | MALE   | Stage IA   | T2  | M0 | N0 |
| TCGA-34-5231 | 1984   | 1      | 72  | MALE   | Stage IA   | T1  | M0 | N0 |
| TCGA-NC-A5HE | 2336   | 0      | 60  | MALE   | Stage IIB  | T2  | M0 | N1 |
| TCGA-34-2600 | 1874   | 1      | 76  | FEMALE | Stage IA   | T1  | M0 | N0 |
| TCGA-66-2769 | 215    | 1      | 75  | MALE   | Stage IIIB | T4  | M0 | N0 |
| TCGA-44-3396 | 1130   | 0      | 74  | FEMALE | Stage IIIA | T2  | M0 | N2 |
| TCGA-18-4083 | 188    | 1      | 63  | MALE   | Stage IIB  | T2  | M0 | N1 |
| TCGA-05-4405 | 610    | 0      | 74  | FEMALE | Stage IB   | T2  | M0 | N0 |
| TCGA-33-AAS8 | 1114   | 1      | 59  | FEMALE | Stage IA   | T1  | MX | N0 |
| TCGA-77-8130 | 4765   | 0      | 69  | MALE   | Stage IIB  | T2  | M0 | N1 |
| TCGA-78-8662 | 3361   | 1      | 53  | FEMALE | Stage IB   | T2  | M0 | N0 |
| TCGA-85-8352 | 161    | 1      | 67  | MALE   | Stage IIIA | T3  | M0 | N1 |
| TCGA-85-A512 | 465    | 0      | 46  | MALE   | Stage IIA  | T1b | M0 | N1 |

|              |      |   |        |        |            |     |        |    |
|--------------|------|---|--------|--------|------------|-----|--------|----|
| TCGA-50-8460 | 829  | 0 | 74     | MALE   | Stage IA   | T1a | M0     | N0 |
| TCGA-55-8087 | 462  | 0 | 59     | FEMALE | Stage IB   | T2a | MX     | N0 |
| TCGA-MP-A4TA | 950  | 1 | 75     | FEMALE | Stage IA   | T1  | M0     | N0 |
| TCGA-77-8145 | 212  | 1 | 73     | MALE   | Stage IIIB | T4  | M0     | N1 |
| TCGA-58-8388 | 412  | 1 | 60     | MALE   | Stage IB   | T2a | M0     | N0 |
| TCGA-18-3415 | 2803 | 1 | 77     | MALE   | Stage IB   | T2  | M0     | N0 |
| TCGA-33-4582 | 3149 | 1 | 55     | MALE   | Stage IA   | T1  | M0     | N0 |
| TCGA-55-7815 | 773  | 0 | 76     | MALE   | Stage IB   | T2a | MX     | N0 |
| TCGA-55-8096 | 719  | 1 | 67     | FEMALE | Stage IB   | T2a | MX     | N0 |
| TCGA-O2-A52V | 1335 | 1 | 75     | FEMALE | Stage II   | T3  | MX     | N0 |
| TCGA-77-7335 | 2133 | 1 | 62     | FEMALE | Stage IIIB | T4  | M0     | N2 |
| TCGA-NJ-A55R | 603  | 0 | 67     | MALE   | Stage IA   | T1b | MX     | N0 |
| TCGA-18-4721 | 4694 | 0 | 74     | MALE   | Stage IA   | T1  | M0     | N0 |
| TCGA-91-7771 | 492  | 0 | 62     | MALE   | Stage IIB  | T3  | MX     | N0 |
| TCGA-96-8170 | 531  | 0 | 75     | FEMALE | Stage IIA  | T1a | M0     | N1 |
| TCGA-52-7810 | 923  | 0 | 60     | FEMALE | Stage IIB  | T3  | M0     | N0 |
| TCGA-NC-A5HR | 1244 | 0 | 75     | FEMALE | Stage IIA  | T2a | M0     | N1 |
| TCGA-39-5021 | 2086 | 1 | 70     | MALE   | Stage IB   | T2a | M0     | N0 |
| TCGA-69-7760 | 202  | 0 | 73     | MALE   | Stage IIB  | T3  | M0     | N0 |
| TCGA-44-5644 | 863  | 0 | 51     | FEMALE | Stage IB   | T2a | unknow | N0 |
| TCGA-69-7973 | 230  | 0 | 42     | FEMALE | Stage IB   | T2a | M0     | N0 |
| TCGA-56-7582 | 601  | 0 | 83     | MALE   | Stage IB   | T2a | M0     | N0 |
| TCGA-96-7545 | 1736 | 1 | 73     | MALE   | Stage IA   | T1  | MX     | N0 |
| TCGA-44-6145 | 595  | 0 | 62     | FEMALE | Stage IA   | T1  | M0     | N0 |
| TCGA-22-5474 | 445  | 1 | 74     | MALE   | Stage IB   | T2a | M0     | N0 |
| TCGA-64-1676 | 1728 | 0 | 58     | MALE   | Stage IA   | T1a | M0     | N0 |
| TCGA-97-7553 | 1870 | 0 | 58     | FEMALE | Stage IA   | T1  | MX     | N0 |
| TCGA-63-A5MI | 1784 | 0 | 65     | MALE   | Stage IIIA | T2  | M0     | N2 |
| TCGA-51-6867 | 1856 | 1 | 72     | FEMALE | Stage I    | T1  | M0     | N0 |
| TCGA-55-8511 | 552  | 0 | 73     | FEMALE | Stage IB   | T2a | MX     | N0 |
| TCGA-MP-A4TF | 336  | 1 | 58     | FEMALE | Stage IIA  | T2b | M0     | N0 |
| TCGA-66-2780 | 366  | 1 | 65     | MALE   | Stage IB   | T2  | M0     | N0 |
| TCGA-85-A510 | 482  | 0 | 74     | FEMALE | Stage IIB  | T2b | M0     | N1 |
| TCGA-90-7964 | 428  | 0 | 70     | MALE   | Stage IB   | T2a | MX     | N0 |
| TCGA-55-8204 | 515  | 0 | 87     | FEMALE | Stage IB   | T2a | MX     | N0 |
| TCGA-56-8309 | 428  | 0 | 66     | MALE   | Stage IA   | T1b | MX     | N0 |
| TCGA-21-5786 | 1032 | 0 | 64     | MALE   | Stage IB   | T2  | M0     | N0 |
| TCGA-55-8616 | 48   | 0 | 58     | FEMALE | Stage IB   | T2a | M0     | N0 |
| TCGA-86-8281 | 0    | 0 | 75     | MALE   | Stage IA   | T1  | M0     | NX |
| TCGA-55-7574 | 995  | 1 | 64     | FEMALE | Stage IB   | T2a | M0     | N0 |
| TCGA-L9-A743 | 664  | 0 | 56     | MALE   | Stage IIA  | T2a | M0     | N1 |
| TCGA-73-4670 | 131  | 0 | 69     | FEMALE | Stage IV   | T2  | M1     | N0 |
| TCGA-50-5066 | 1442 | 0 | 72     | MALE   | Stage IB   | T2  | M0     | N0 |
| TCGA-85-8582 | 1160 | 0 | 49     | MALE   | Stage IA   | T1a | M0     | N0 |
| TCGA-98-A53B | 61   | 1 | 69     | MALE   | Stage IB   | T2a | M0     | N0 |
| TCGA-75-5126 |      | 0 | unknow | FEMALE | Stage IIIA | T3  | M0     | N2 |
| TCGA-66-2757 | 1338 | 1 | 65     | FEMALE | Stage IA   | T1  | M0     | N0 |
| TCGA-98-8022 | 933  | 1 | 61     | MALE   | Stage IA   | T1a | M0     | N0 |
| TCGA-85-7950 | 576  | 0 | 46     | MALE   | Stage IB   | T2a | M0     | N0 |
| TCGA-66-2791 | 153  | 1 | 66     | MALE   | Stage IIIB | T2  | M0     | N3 |
| TCGA-98-A53H | 618  | 0 | 76     | FEMALE | Stage IA   | T1a | M0     | N0 |
| TCGA-56-8625 | 315  | 1 | 66     | FEMALE | Stage IIIA | T3  | MX     | N1 |
| TCGA-34-8454 | 1180 | 0 | 62     | FEMALE | Stage IIIA | T3  | M0     | N1 |
| TCGA-70-6723 | 375  | 0 | 65     | MALE   | Stage IIA  | T3  | M0     | N0 |
| TCGA-34-2604 | 958  | 1 | 81     | FEMALE | Stage IB   | T2  | M0     | N0 |
| TCGA-46-3769 | 135  | 0 | 57     | MALE   | unknow     | T4  | M0     | N0 |
| TCGA-64-5779 | 864  | 0 | 61     | MALE   | Stage IIIA | T2  | M0     | N2 |
| TCGA-55-6543 | 435  | 0 | 60     | FEMALE | Stage IA   | T1b | MX     | N0 |

|              |      |   |         |        |            |     |         |    |
|--------------|------|---|---------|--------|------------|-----|---------|----|
| TCGA-55-A48Z | 651  | 0 | 60      | FEMALE | Stage IIIB | T1a | MX      | N3 |
| TCGA-86-8278 | 944  | 0 | 63      | FEMALE | Stage IIB  | T2  | M0      | N1 |
| TCGA-L4-A4E5 | 578  | 0 | 48      | FEMALE | Stage I    | T1  | M0      | N0 |
| TCGA-22-1012 | 429  | 1 | 80      | FEMALE | Stage IB   | T2  | M0      | N0 |
| TCGA-21-1072 | 3016 | 0 | 75      | MALE   | Stage IB   | T2  | M0      | N0 |
| TCGA-49-4505 | 428  | 1 | 61      | FEMALE | Stage IIB  | T2  | M0      | N1 |
| TCGA-22-4595 | 734  | 1 | 57      | MALE   | Stage IIIA | T3  | Junknov | N2 |
| TCGA-69-7980 | 411  | 0 | 70      | FEMALE | Stage I    | T1b | M0      | N0 |
| TCGA-55-7725 | 442  | 0 | 68      | FEMALE | Stage IA   | T1a | MX      | N0 |
| TCGA-78-7162 | 3169 | 1 | 75      | MALE   | Stage IA   | T1  | M0      | N0 |
| TCGA-34-5929 | 151  | 1 | 78      | FEMALE | Stage IB   | T2  | M0      | N0 |
| TCGA-85-A4QQ | 927  | 1 | 68      | MALE   | Stage IB   | T2a | M0      | N0 |
| TCGA-80-5608 | 2832 | 0 | Junknov | FEMALE | Stage IA   | T1  | M0      | N0 |
| TCGA-78-7159 | 1974 | 0 | 60      | FEMALE | Stage IA   | T1  | M0      | NX |
| TCGA-MP-A4TI | 429  | 1 | 72      | MALE   | Stage IIA  | T2a | M0      | N1 |
| TCGA-78-7542 | 321  | 1 | 56      | MALE   | Stage IB   | T2  | M0      | N0 |
| TCGA-91-6836 | 417  | 0 | 52      | FEMALE | Stage IB   | T2  | MX      | N0 |
| TCGA-NK-A5D1 | 511  | 0 | 57      | MALE   | Stage IIA  | T2a | M0      | N1 |
| TCGA-78-7537 | 1622 | 1 | 72      | MALE   | Stage IB   | T2  | M0      | N0 |
| TCGA-97-7941 | 484  | 0 | 72      | FEMALE | Stage IA   | T1b | MX      | N0 |
| TCGA-MP-A4TJ | 339  | 1 | 62      | FEMALE | Stage IA   | T1  | M0      | N0 |
| TCGA-78-8660 | 321  | 1 | 69      | MALE   | Stage IIB  | T2  | M0      | N1 |
| TCGA-49-AARQ | 6732 | 0 | 41      | FEMALE | Stage I    | T2  | MX      | N0 |
| TCGA-63-6202 | 1602 | 0 | Junknov | MALE   | Stage IIA  | T2  | M0      | N0 |
| TCGA-60-2724 | 717  | 0 | 47      | MALE   | Stage IIIA | T3  | M0      | N1 |
| TCGA-05-4415 | 91   | 1 | 57      | MALE   | Stage IIIB | T4  | M0      | N2 |
| TCGA-34-5240 | 1541 | 0 | 73      | FEMALE | Stage IIB  | T2  | M0      | N1 |
| TCGA-66-2773 | 92   | 1 | 69      | MALE   | Stage IB   | T2  | M0      | N0 |
| TCGA-39-5039 | 544  | 1 | 76      | MALE   | Stage IIA  | T2b | M0      | N0 |
| TCGA-86-A4JF | 737  | 1 | 56      | MALE   | Stage IIB  | T3  | M0      | N0 |
| TCGA-86-7701 | 947  | 0 | 66      | MALE   | Stage IV   | T2  | M1      | N0 |
| TCGA-44-3918 | 1036 | 0 | 60      | FEMALE | Stage IA   | T1  | M0      | N0 |
| TCGA-60-2697 | 372  | 1 | 41      | MALE   | Stage IIA  | T2  | M0      | N2 |
| TCGA-63-7023 | 1682 | 0 | Junknov | MALE   | Stage IIA  | T1  | M0      | N1 |
| TCGA-56-7822 | 532  | 1 | 75      | MALE   | Stage IIB  | T2b | M0      | N1 |
| TCGA-50-6597 | 1268 | 1 | 79      | FEMALE | Stage IB   | T2  | M0      | N0 |
| TCGA-NJ-A4YI | 4    | 1 | 87      | FEMALE | Stage IIIA | T2  | M0      | N2 |
| TCGA-86-8280 | 701  | 0 | 54      | FEMALE | Stage IIA  | T2b | M0      | N0 |
| TCGA-77-8140 | 351  | 1 | 66      | FEMALE | Stage IIB  | T2  | M0      | N1 |
| TCGA-44-2666 | 97   | 1 | 43      | MALE   | Stage IB   | T2  | M0      | N0 |
| TCGA-78-7154 | 593  | 1 | 72      | MALE   | Stage IIIA | T3  | M0      | N2 |
| TCGA-77-8128 | 1150 | 1 | 60      | MALE   | Stage IIIA | T2  | M0      | N2 |
| TCGA-55-A491 | 626  | 0 | 81      | FEMALE | Stage IA   | T1b | MX      | N0 |
| TCGA-05-4390 | 1126 | 0 | 58      | FEMALE | Stage IB   | T2  | M0      | N0 |
| TCGA-22-5491 | 1713 | 1 | 74      | MALE   | Stage IA   | T1a | M0      | N0 |
| TCGA-05-4382 | 607  | 0 | 68      | MALE   | Stage IB   | T2  | M0      | N0 |
| TCGA-55-8206 | 888  | 0 | 56      | MALE   | Stage IA   | T1b | M0      | N0 |
| TCGA-55-7576 | 670  | 0 | 54      | MALE   | Stage IB   | T2a | M0      | N0 |
| TCGA-55-8506 | 11   | 0 | 62      | FEMALE | Stage IIB  | T3  | MX      | N0 |
| TCGA-50-5930 | 282  | 1 | 47      | MALE   | Stage IIIA | T2  | M0      | N2 |
| TCGA-05-4403 | 578  | 0 | 76      | MALE   | Stage IB   | T2  | M0      | N0 |
| TCGA-55-7911 | 537  | 0 | 70      | FEMALE | Stage IA   | T1a | MX      | N0 |
| TCGA-66-2783 | 759  | 0 | 67      | MALE   | Stage IIIB | T2  | M0      | N3 |
| TCGA-78-7143 | 4961 | 1 | 62      | FEMALE | Stage IB   | T2  | M0      | N0 |
| TCGA-62-A46P | 594  | 1 | 65      | MALE   | Stage IB   | T2  | M0      | N0 |
| TCGA-60-2707 | 667  | 1 | 70      | MALE   | Stage IB   | T2  | M0      | N0 |
| TCGA-58-8392 | 501  | 1 | 70      | MALE   | Stage IB   | T2a | M0      | N0 |
| TCGA-95-8494 | 84   | 0 | 67      | MALE   | Stage IIA  | T2a | M0      | N1 |

|              |      |   |        |        |            |     |    |    |
|--------------|------|---|--------|--------|------------|-----|----|----|
| TCGA-66-2778 | 578  | 0 | 68     | FEMALE | Stage IIIB | T2  | M0 | N3 |
| TCGA-34-8456 | 804  | 0 | 71     | FEMALE | Stage IIA  | T2a | M0 | N1 |
| TCGA-66-2753 | 31   | 0 | 69     | MALE   | Stage IB   | T2  | M0 | N0 |
| TCGA-35-5375 | 264  | 0 | 61     | MALE   | Stage IIIA | T2  | M0 | N2 |
| TCGA-98-A53C | 822  | 0 | 77     | FEMALE | Stage IA   | T1a | M0 | N0 |
| TCGA-33-AASL | 826  | 1 | 57     | FEMALE | Stage IA   | T1  | MX | N0 |
| TCGA-78-7163 | 7248 | 0 | 60     | MALE   | Stage IB   | T2  | M0 | N0 |
| TCGA-05-4417 | 455  | 0 | 51     | FEMALE | Stage IB   | T2  | M0 | N0 |
| TCGA-91-6828 | 323  | 0 | 70     | MALE   | Stage IA   | T1a | M0 | N0 |
| TCGA-44-A47A | 466  | 0 | 78     | FEMALE | Stage IB   | T2a | MX | N0 |
| TCGA-L9-A443 | 193  | 1 | 63     | FEMALE | Stage IA   | T1a | MX | N0 |
| TCGA-85-8277 | 307  | 1 | 70     | MALE   | Stage IIIA | T3  | M0 | N1 |
| TCGA-86-A4D0 | 116  | 1 | 48     | MALE   | Stage IIA  | T2b | M0 | N0 |
| TCGA-63-7020 | 2133 | 0 | unknow | MALE   | Stage IA   | T1  | M0 | N0 |
| TCGA-44-A479 | 486  | 0 | 73     | FEMALE | Stage IB   | T2  | MX | N0 |
| TCGA-22-5483 | 573  | 1 | 74     | MALE   | Stage IIA  | T1a | M0 | N1 |
| TCGA-63-A5MH | 2026 | 0 | 68     | MALE   | Stage IA   | T1  | M0 | N0 |
| TCGA-97-A4LX | 614  | 0 | 81     | MALE   | Stage IB   | T2a | M0 | N0 |
| TCGA-56-A4BY | 543  | 1 | 66     | MALE   | Stage IB   | T2a | MX | N0 |
| TCGA-52-7812 | 835  | 1 | 68     | MALE   | unknow     | T2  | M0 | N2 |
| TCGA-60-2708 | 2447 | 0 | 64     | FEMALE | Stage IIB  | T2  | M0 | N1 |
| TCGA-85-7696 | 1111 | 0 | 64     | MALE   | Stage IA   | T1  | M0 | N0 |
| TCGA-49-4486 | 2318 | 1 | 72     | MALE   | Stage IA   | T1  | M0 | N0 |
| TCGA-50-5932 | 1235 | 1 | 75     | MALE   | Stage IIB  | T2  | M0 | N1 |
| TCGA-60-2709 | 1505 | 0 | 69     | MALE   | Stage IB   | T2  | MX | N0 |
| TCGA-86-8073 | 740  | 0 | 58     | MALE   | Stage IB   | T2a | M0 | N0 |
| TCGA-NJ-A55O | 13   | 0 | 56     | FEMALE | Stage IIA  | T1b | M0 | N1 |
| TCGA-55-A494 | 481  | 0 | 61     | FEMALE | Stage IB   | T2a | MX | N0 |
| TCGA-69-7765 | 165  | 0 | 56     | MALE   | unknow     | T4  | MX | N0 |
| TCGA-18-3416 | 973  | 1 | 83     | MALE   | Stage IIB  | T2  | M0 | N1 |
| TCGA-90-A59Q | 322  | 1 | 61     | FEMALE | Stage IIA  | T2a | MX | N1 |
| TCGA-86-8672 | 19   | 1 | 59     | MALE   | Stage IIB  | T3  | M0 | N0 |
| TCGA-49-4488 | 869  | 1 | 74     | FEMALE | Stage IA   | T1  | MX | N0 |
| TCGA-85-8353 | 94   | 1 | 72     | MALE   | Stage IIIA | T3  | M0 | N1 |
| TCGA-18-3406 | 371  | 1 | 67     | MALE   | Stage IA   | T1  | M0 | N0 |
| TCGA-55-7903 | 567  | 0 | 64     | MALE   | Stage IA   | T1b | MX | N0 |
| TCGA-85-8287 | 23   | 1 | 72     | MALE   | Stage IA   | T1b | M0 | N0 |
| TCGA-37-4133 | 238  | 0 | 63     | MALE   | Stage IIIA | T4  | M0 | N0 |
| TCGA-MP-A4T2 | 1136 | 1 | 71     | MALE   | Stage IA   | T1  | M0 | N0 |
| TCGA-58-A46M | 1072 | 0 | 61     | MALE   | Stage IIB  | T2b | M0 | N1 |
| TCGA-49-4487 | 855  | 1 | 72     | FEMALE | Stage IA   | T1  | M0 | N0 |
| TCGA-99-8033 | 656  | 1 | 74     | FEMALE | Stage IV   | TX  | M1 | NX |
| TCGA-56-8628 | 616  | 0 | 78     | MALE   | Stage IA   | T1b | MX | N0 |
| TCGA-85-8666 | 687  | 1 | 65     | MALE   | Stage IB   | T2a | M0 | N0 |
| TCGA-6A-AB49 |      | 1 | 73     | FEMALE | Stage IB   | T2  | MX | N0 |
| TCGA-50-5068 | 1499 | 1 | 59     | FEMALE | Stage IIB  | T2  | MX | N1 |
| TCGA-66-2768 | 61   | 0 | 57     | MALE   | Stage IIB  | T2  | M0 | N1 |
| TCGA-58-A46J | 2589 | 0 | 64     | MALE   | Stage IIB  | T2  | M0 | N1 |
| TCGA-55-6978 | 176  | 1 | 81     | MALE   | Stage IIA  | T2b | MX | N0 |
| TCGA-91-A4BC | 44   | 0 | 59     | MALE   | Stage IIA  | T2b | MX | N0 |
| TCGA-56-8082 | 455  | 0 | 80     | FEMALE | Stage IIA  | T2b | MX | N0 |
| TCGA-NC-A5HL | 88   | 1 | 73     | MALE   | Stage IIA  | T2b | M0 | N0 |
| TCGA-56-8201 | 397  | 1 | 74     | MALE   | Stage IIB  | T3  | MX | N0 |
| TCGA-85-8350 | 683  | 0 | 61     | MALE   | Stage IA   | T1b | M0 | N0 |
| TCGA-49-4490 | 385  | 1 | 45     | FEMALE | Stage IIIA | T3  | M0 | N2 |
| TCGA-86-7955 | 1072 | 0 | 62     | MALE   | Stage IB   | T2a | M0 | N0 |
| TCGA-21-1083 | 1315 | 1 | 75     | MALE   | Stage IA   | T1  | M0 | N0 |
| TCGA-85-6560 | 1259 | 0 | 59     | MALE   | Stage IIA  | T1b | M0 | N1 |

|              |      |   |        |        |            |     |     |    |
|--------------|------|---|--------|--------|------------|-----|-----|----|
| TCGA-94-8491 | 810  | 0 | 73     | MALE   | Stage IIA  | T2a | M0  | N1 |
| TCGA-05-4430 | 761  | 0 | 59     | FEMALE | Stage IB   | T2  | M0  | N0 |
| TCGA-44-3398 | 1163 | 0 | 77     | FEMALE | Stage IA   | T1b | M0  | N0 |
| TCGA-49-4507 | 268  | 1 | 73     | FEMALE | Stage IIIA | T3  | M0  | N1 |
| TCGA-97-A4M5 | 634  | 0 | 83     | MALE   | Stage IA   | T1b | M0  | N0 |
| TCGA-33-4583 | 4601 | 1 | 73     | MALE   | Stage IA   | T1  | M0  | N0 |
| TCGA-49-6745 | 522  | 0 | 82     | MALE   | Stage IIIA | T2a | M0  | N2 |
| TCGA-22-4607 | 587  | 1 | 75     | MALE   | Stage IB   | T2a | M0  | N0 |
| TCGA-86-8674 | 806  | 0 | 50     | MALE   | Stage IIA  | T2a | M0  | N1 |
| TCGA-85-6175 | 294  | 1 | 63     | FEMALE | Stage IIB  | T3  | M0  | N0 |
| TCGA-22-4593 | 1067 | 1 | 77     | MALE   | Stage IIA  | T2b | M0  | N0 |
| TCGA-66-2794 | 1645 | 0 | 64     | MALE   | Stage IIIB | T4  | M0  | N2 |
| TCGA-66-2759 | 762  | 0 | 66     | MALE   | Stage IIIA | T2  | M0  | N2 |
| TCGA-MF-A522 | 360  | 1 | 54     | MALE   | Stage IB   | T2a | MX  | N0 |
| TCGA-85-8052 | 734  | 0 | 53     | MALE   | Stage IIB  | T3  | M0  | N0 |
| TCGA-05-4384 | 426  | 0 | 66     | MALE   | Stage IIIA | T2  | M0  | N2 |
| TCGA-69-7979 | 408  | 0 | 71     | FEMALE | Stage IB   | T2a | MX  | N0 |
| TCGA-85-8072 | 932  | 0 | 60     | MALE   | Stage IA   | T1a | M0  | N0 |
| TCGA-78-7147 | 586  | 1 | 67     | FEMALE | Stage IIB  | T2  | M0  | N1 |
| TCGA-93-7347 | 683  | 0 | 76     | FEMALE | Stage IA   | T1a | MX  | N0 |
| TCGA-46-6026 | 423  | 0 | 81     | MALE   | Stage IIB  | T2a | M0  | N1 |
| TCGA-85-A53L | 377  | 0 | 63     | MALE   | Stage IIA  | T2b | M0  | N0 |
| TCGA-63-7022 | 2073 | 0 | unknov | FEMALE | Stage IA   | T1  | M0  | N0 |
| TCGA-49-4514 | 1700 | 0 | 79     | FEMALE | Stage IA   | T1  | M0  | N0 |
| TCGA-49-6742 | 488  | 1 | 70     | MALE   | Stage IIA  | T2a | M0  | N1 |
| TCGA-MN-A4N1 | 827  | 0 | 60     | MALE   | Stage IIA  | T2a | M0  | N1 |
| TCGA-J2-A4AD | 550  | 1 | 61     | FEMALE | Stage IA   | T1a | MX  | N0 |
| TCGA-78-7160 | 697  | 1 | 61     | MALE   | Stage IV   | T4  | M1  | N2 |
| TCGA-05-4397 | 731  | 1 | 65     | MALE   | Stage IIB  | T2  | M0  | N1 |
| TCGA-91-8497 | 434  | 1 | 75     | FEMALE | Stage IA   | T1a | MX  | N0 |
| TCGA-56-5898 | 555  | 0 | 69     | MALE   | Stage IA   | T1b | M0  | N0 |
| TCGA-77-A5G3 | 4570 | 0 | 63     | MALE   | Stage IIB  | T2  | M0  | N1 |
| TCGA-33-4589 | 47   | 1 | 62     | FEMALE | Stage IIB  | T2  | M0  | N1 |
| TCGA-18-3408 | 2304 | 1 | 77     | FEMALE | Stage IB   | T2  | M0  | N0 |
| TCGA-39-5031 | 1841 | 1 | 76     | FEMALE | Stage IA   | T1a | M0  | N0 |
| TCGA-79-5596 |      | 0 | unknov | MALE   | Stage IIIA | T3  | M0  | N1 |
| TCGA-O2-A52Q | 113  | 1 | 44     | FEMALE | Stage III  | T3  | MX  | N1 |
| TCGA-85-6798 | 195  | 1 | 57     | MALE   | Stage IIIA | T3  | M0  | N1 |
| TCGA-55-7283 | 609  | 0 | 76     | FEMALE | Stage IIIA | T3  | MX  | N2 |
| TCGA-66-2781 | 121  | 0 | 67     | MALE   | Stage IB   | T2  | M0  | N0 |
| TCGA-05-4244 | 0    | 0 | 70     | MALE   | Stage IV   | T2  | M1  | N2 |
| TCGA-91-6848 | 224  | 0 | 59     | MALE   | Stage IIIA | T2  | MX  | N2 |
| TCGA-56-A4BX | 405  | 0 | 70     | MALE   | Stage IIA  | T2b | MX  | N0 |
| TCGA-MP-A4TD | 307  | 1 | 71     | MALE   | Stage IIIA | T2  | M0  | N2 |
| TCGA-55-8620 | 375  | 1 | 60     | MALE   | Stage IV   | T1a | M1b | N1 |
| TCGA-56-6546 |      | 0 | 67     | MALE   | Stage IIA  | T2b | MX  | N0 |
| TCGA-97-7547 | 1965 | 0 | 67     | FEMALE | Stage IB   | T2  | MX  | N0 |
| TCGA-39-5040 | 519  | 1 | 59     | MALE   | Stage IIIA | T2a | M0  | N2 |
| TCGA-98-7454 | 652  | 0 | 73     | MALE   | Stage IB   | T2a | M0  | N0 |
| TCGA-44-6777 | 987  | 1 | 85     | FEMALE | Stage IB   | T2  | MX  | NX |
| TCGA-38-4629 | 864  | 1 | 68     | MALE   | Stage IIB  | T3  | M0  | N0 |
| TCGA-55-8097 | 476  | 0 | 60     | FEMALE | Stage IA   | T1a | MX  | N0 |
| TCGA-60-2715 | 1075 | 1 | 51     | MALE   | Stage IA   | T1  | M0  | N0 |
| TCGA-18-5592 | 1519 | 0 | 57     | MALE   | Stage IIB  | T3  | M0  | N0 |
| TCGA-34-5241 | 515  | 1 | 79     | MALE   | Stage IB   | T2  | M0  | N0 |
| TCGA-97-8179 | 435  | 0 | 72     | MALE   | Stage IA   | T1a | M0  | N0 |
| TCGA-43-A56V | 366  | 0 | 61     | MALE   | Stage IIIA | T2a | M0  | N2 |
| TCGA-78-8648 | 1209 | 1 | 58     | FEMALE | Stage IIB  | T3  | M0  | N0 |

|              |      |   |        |        |            |     |        |    |
|--------------|------|---|--------|--------|------------|-----|--------|----|
| TCGA-56-8307 | 818  | 0 | 55     | FEMALE | Stage IIB  | T3  | M0     | N0 |
| TCGA-77-A5GF | 840  | 1 | 70     | MALE   | Stage IIA  | T2a | M0     | N1 |
| TCGA-75-5125 | 2027 | 1 | unknov | MALE   | Stage IIB  | T2  | M0     | N1 |
| TCGA-95-7944 | 377  | 0 | 71     | MALE   | Stage IA   | T1a | M0     | N0 |
| TCGA-43-5668 | 559  | 1 | 78     | MALE   | Stage IIA  | T1b | M0     | N1 |
| TCGA-44-6147 | 845  | 0 | 67     | FEMALE | Stage IA   | T1b | M0     | NX |
| TCGA-55-7727 | 119  | 0 | 70     | MALE   | Stage IIIA | T1a | MX     | N2 |
| TCGA-63-A5MT | 498  | 0 | 74     | MALE   | Stage IIB  | T3  | M0     | N0 |
| TCGA-85-8580 | 1113 | 0 | 52     | FEMALE | Stage IB   | T2a | M0     | N0 |
| TCGA-22-5492 | 506  | 1 | 73     | FEMALE | Stage IIIA | T2a | M0     | N2 |
| TCGA-95-7039 | 1272 | 0 | 54     | FEMALE | Stage IIB  | T3  | MX     | N0 |
| TCGA-51-4079 | 12   | 1 | 73     | FEMALE | Stage IB   | T2  | unknov | N0 |
| TCGA-56-8304 | 106  | 0 | 73     | FEMALE | Stage IA   | T1b | MX     | N0 |
| TCGA-55-6975 | 118  | 1 | 61     | MALE   | Stage IIB  | T2  | M0     | N1 |
| TCGA-05-4433 | 730  | 0 | 82     | MALE   | Stage IB   | T2  | M0     | N0 |
| TCGA-05-4427 | 791  | 0 | 65     | FEMALE | Stage IIB  | T2  | M0     | N1 |
| TCGA-68-A59J | 448  | 0 | 74     | FEMALE | Stage IB   | T2a | MX     | N0 |
| TCGA-86-7711 | 1046 | 1 | 70     | MALE   | Stage IIA  | T2a | M0     | N1 |
| TCGA-63-5128 |      | 1 | unknov | MALE   | Stage IB   | T2  | M0     | N0 |
| TCGA-69-7761 | 186  | 0 | 84     | MALE   | Stage IB   | T2a | MX     | N0 |
| TCGA-44-2661 | 1159 | 0 | 69     | FEMALE | Stage IA   | T1  | M0     | N0 |
| TCGA-55-6981 | 1379 | 1 | 53     | FEMALE | Stage IIIA | T1  | M0     | N2 |
| TCGA-21-1080 | 3724 | 0 | 66     | MALE   | Stage IB   | T2  | M0     | N0 |
| TCGA-MP-A4TH | 741  | 0 | 70     | FEMALE | Stage IA   | T1a | M0     | N0 |
| TCGA-55-8299 | 469  | 1 | 61     | FEMALE | Stage IA   | T1b | MX     | N0 |
| TCGA-39-5034 | 1107 | 1 | 73     | FEMALE | Stage IIB  | T3  | M0     | N0 |
| TCGA-L4-A4E6 | 435  | 0 | 67     | MALE   | Stage IA   | T1  | M0     | N0 |
| TCGA-44-A47F | 337  | 0 | 74     | MALE   | Stage IIB  | T2b | M0     | N1 |
| TCGA-55-7913 | 561  | 1 | 61     | FEMALE | Stage IA   | T1b | MX     | N0 |
| TCGA-38-4628 | 1492 | 1 | 65     | FEMALE | Stage IIB  | T2  | M0     | N1 |
| TCGA-77-7138 | 340  | 1 | 67     | MALE   | Stage IB   | T2  | M0     | N0 |
| TCGA-67-6215 | 174  | 0 | 52     | FEMALE | Stage IB   | T2a | M0     | N0 |
| TCGA-NJ-A7XG | 617  | 0 | 49     | MALE   | Stage IIIA | T4  | M0     | N1 |
| TCGA-58-A46K | 1045 | 1 | 59     | MALE   | Stage IIIA | T2  | M0     | N2 |
| TCGA-63-A5MN | 345  | 1 | 78     | FEMALE | Stage IIB  | T3  | M0     | N0 |
| TCGA-67-3772 | 573  | 0 | 82     | FEMALE | Stage IB   | T2  | M0     | N0 |
| TCGA-S2-AA1A | 513  | 0 | 68     | FEMALE | Stage IA   | T1b | M0     | N0 |
| TCGA-66-2790 | 699  | 0 | 72     | MALE   | Stage IIB  | T2  | M0     | N1 |
| TCGA-49-6767 | 677  | 0 | 46     | FEMALE | Stage IIB  | T3  | MX     | N0 |
| TCGA-55-6980 | 2109 | 0 | 56     | MALE   | Stage IA   | T1  | M0     | N0 |
| TCGA-44-6144 | 723  | 0 | 58     | MALE   | Stage IA   | T1a | M0     | N0 |
| TCGA-85-7843 | 35   | 0 | 50     | MALE   | Stage IIA  | T2a | M0     | N1 |
| TCGA-63-A5MB | 3123 | 0 | 62     | MALE   | Stage IB   | T2  | M0     | N0 |
| TCGA-44-5645 | 852  | 0 | 61     | FEMALE | Stage IA   | T1  | unknov | NX |
| TCGA-MP-A4T7 | 167  | 1 | 75     | FEMALE | Stage IV   | T2  | M1     | N0 |
| TCGA-62-A46V | 2199 | 0 | 78     | FEMALE | Stage IB   | T2  | M0     | N0 |
| TCGA-44-6774 | 658  | 0 | 56     | FEMALE | Stage IIIA | T1  | M0     | N2 |
| TCGA-55-8621 | 515  | 0 | 75     | FEMALE | Stage IA   | T1a | MX     | N0 |
| TCGA-05-4396 | 303  | 1 | 76     | MALE   | Stage IIIB | T4  | M0     | N1 |
| TCGA-55-7573 | 487  | 0 | 72     | FEMALE | Stage IA   | T1b | MX     | N0 |
| TCGA-49-AARR | 4992 | 0 | 68     | MALE   | Stage IA   | T1  | MX     | N0 |
| TCGA-97-A4M3 | 540  | 0 | 69     | FEMALE | Stage IA   | T1b | M0     | N0 |
| TCGA-49-AARO | 3759 | 0 | 39     | FEMALE | Stage IA   | T1a | MX     | N0 |
| TCGA-NK-A5CT | 1997 | 0 | 70     | MALE   | Stage IA   | T1  | M0     | N0 |
| TCGA-91-6830 | 60   | 0 | 65     | FEMALE | Stage IIA  | T1  | MX     | N1 |
| TCGA-77-8007 | 198  | 1 | 68     | MALE   | Stage IIB  | T2  | M0     | N1 |
| TCGA-56-A49D | 637  | 0 | 67     | MALE   | Stage IIIA | T2a | MX     | N2 |
| TCGA-38-6178 | 448  | 0 | 70     | FEMALE | Stage IIIA | T2b | unknov | N2 |

|              |      |   |        |        |            |     |    |    |
|--------------|------|---|--------|--------|------------|-----|----|----|
| TCGA-55-8091 | 600  | 0 | 74     | MALE   | Stage IB   | T2  | MX | N0 |
| TCGA-66-2755 | 28   | 0 | 63     | MALE   | Stage IB   | T2  | M0 | N0 |
| TCGA-55-8507 | 418  | 0 | 53     | MALE   | Stage IA   | T1a | MX | N0 |
| TCGA-43-8116 | 358  | 0 | 73     | MALE   | Stage IA   | T1b | M0 | N0 |
| TCGA-75-7030 |      | 0 | unknov | MALE   | Stage IIB  | T3  | M0 | N0 |
| TCGA-86-A456 | 896  | 0 | 78     | FEMALE | Stage IA   | T1a | M0 | N0 |
| TCGA-77-A5FZ | 3838 | 1 | 64     | MALE   | Stage IIB  | T4  | M0 | N0 |
| TCGA-85-8049 | 579  | 0 | 57     | MALE   | Stage IB   | T2a | M0 | N0 |
| TCGA-55-A492 | 596  | 0 | 70     | FEMALE | Stage IA   | T1a | MX | N0 |
| TCGA-85-8481 | 236  | 1 | 70     | MALE   | Stage IIB  | T3  | M0 | N0 |
| TCGA-64-1678 | 1189 | 0 | 70     | FEMALE | unknow     | T2b | M0 | N0 |
| TCGA-43-6770 | 653  | 0 | 59     | FEMALE | Stage IB   | T2a | MX | N0 |
| TCGA-62-8399 | 2696 | 0 | 62     | MALE   | Stage IIIA | T2  | M0 | N2 |
| TCGA-55-6985 | 1233 | 0 | 58     | FEMALE | Stage IB   | T2  | MX | N0 |
| TCGA-44-8120 | 260  | 0 | 58     | MALE   | Stage IB   | T2a | M0 | N0 |
| TCGA-56-8624 | 420  | 0 | 84     | MALE   | Stage IIB  | T3  | MX | N0 |
| TCGA-60-2722 | 908  | 0 | 66     | MALE   | Stage IIB  | T2  | M0 | N1 |
| TCGA-50-5935 | 653  | 1 | 86     | FEMALE | Stage IA   | T1  | M0 | N0 |
| TCGA-37-A5EN | 660  | 0 | 59     | MALE   | Stage IIB  | T4  | M0 | N2 |
| TCGA-50-5044 | 624  | 1 | 72     | FEMALE | Stage IIB  | T4  | M0 | N1 |
| TCGA-55-8085 | 904  | 0 | 64     | MALE   | Stage IA   | T1b | M0 | N0 |
| TCGA-58-8386 | 1    | 1 | 75     | MALE   | Stage IV   | T3  | M1 | NX |
| TCGA-60-2695 | 642  | 0 | 74     | FEMALE | Stage IB   | T2  | M0 | N0 |
| TCGA-L9-A444 | 307  | 0 | 60     | FEMALE | Stage IA   | T1a | MX | N0 |
| TCGA-46-3767 | 396  | 0 | 76     | MALE   | Stage IA   | T1a | M0 | N0 |
| TCGA-55-8615 | 446  | 0 | 67     | MALE   | Stage IIIA | T3  | MX | N2 |
| TCGA-43-6647 | 757  | 0 | 69     | FEMALE | Stage IIB  | T2b | MX | N1 |
| TCGA-77-7142 | 2227 | 0 | 59     | FEMALE | Stage IB   | T2  | M0 | N0 |
| TCGA-97-A4M0 | 652  | 0 | 60     | FEMALE | Stage IB   | T2a | M0 | N0 |
| TCGA-85-A4PA | 741  | 0 | 61     | MALE   | Stage IB   | T2a | M0 | N0 |
| TCGA-95-7562 | 87   | 1 | 71     | MALE   | Stage IIA  | T2a | M0 | N1 |
| TCGA-38-4626 | 3674 | 0 | 57     | FEMALE | unknow     | T2b | M0 | N0 |
| TCGA-21-1077 | 1058 | 1 | 64     | MALE   | Stage IIB  | T2  | M0 | N1 |
| TCGA-22-0944 | 223  | 1 | 61     | MALE   | Stage IB   | T2  | M0 | N0 |
| TCGA-67-6216 | 141  | 0 | 57     | FEMALE | Stage IA   | T1a | M0 | N0 |
| TCGA-60-2725 | 816  | 0 | 74     | MALE   | Stage IB   | T2  | M0 | N0 |
| TCGA-75-6203 |      | 0 | unknov | FEMALE | Stage IIIA | T2  | M0 | N2 |
| TCGA-67-3773 | 427  | 0 | 84     | FEMALE | Stage IB   | T2  | M0 | N0 |
| TCGA-78-7161 | 291  | 1 | 69     | FEMALE | Stage IIB  | T3  | M0 | N0 |
| TCGA-NJ-A4YQ | 1432 | 0 | 69     | FEMALE | Stage IA   | T1b | M0 | N0 |
| TCGA-50-5072 | 250  | 1 | 74     | MALE   | Stage IIIA | T2  | M0 | N2 |
| TCGA-70-6722 | 367  | 0 | 47     | MALE   | Stage IIIA | T3  | M0 | N1 |
| TCGA-50-5931 | 434  | 1 | 75     | FEMALE | Stage IB   | T2  | M0 | N0 |
| TCGA-49-AARN | 1135 | 1 | 56     | FEMALE | Stage IA   | T1  | MX | N0 |
| TCGA-64-1681 | 1167 | 1 | 61     | FEMALE | Stage IA   | T1  | M0 | N0 |
| TCGA-99-7458 | 747  | 0 | 74     | FEMALE | Stage IIIA | T4  | M0 | N0 |
| TCGA-35-4122 | 225  | 0 | 69     | MALE   | Stage IA   | T1  | M0 | N0 |
| TCGA-55-7728 | 704  | 0 | 64     | FEMALE | Stage IB   | T2a | MX | N0 |
| TCGA-66-2788 | 699  | 0 | 56     | MALE   | Stage IB   | T2  | M0 | N0 |
| TCGA-44-7672 | 719  | 0 | 52     | FEMALE | Stage IA   | T1b | M0 | N0 |
| TCGA-44-7662 | 218  | 0 | 61     | MALE   | Stage IB   | T2a | MX | N0 |
| TCGA-18-3409 | 3747 | 0 | 74     | MALE   | Stage IA   | T1  | M0 | N0 |
| TCGA-63-A5MM | 456  | 1 | 69     | FEMALE | Stage IIB  | T2  | M0 | N1 |
| TCGA-86-7714 | 625  | 1 | 61     | FEMALE | Stage IIIA | T1b | M0 | N2 |
| TCGA-97-7552 | 1932 | 0 | 70     | MALE   | Stage IB   | T2  | MX | N0 |
| TCGA-44-5643 | 1013 | 0 | 53     | MALE   | Stage IIIA | T2b | M0 | N2 |
| TCGA-33-4547 | 2419 | 0 | 68     | MALE   | Stage IB   | T2  | M0 | N0 |
| TCGA-75-7025 | 3305 | 0 | unknov | MALE   | Stage IB   | T2  | M0 | N0 |

|              |      |   |        |        |            |     |        |    |
|--------------|------|---|--------|--------|------------|-----|--------|----|
| TCGA-90-7766 | 289  | 0 | 66     | FEMALE | Stage IA   | T1b | MX     | N0 |
| TCGA-78-8655 | 2360 | 0 | 77     | FEMALE | Stage IA   | T1  | M0     | N0 |
| TCGA-97-7937 | 564  | 0 | 65     | MALE   | Stage IB   | T2a | MX     | N0 |
| TCGA-64-1679 | 2488 | 0 | 58     | FEMALE | Stage IIIA | T1  | M0     | N2 |
| TCGA-22-5479 | 2625 | 1 | 64     | MALE   | Stage IB   | T2  | M0     | N0 |
| TCGA-86-A4P8 | 805  | 0 | 59     | FEMALE | Stage IIIA | T1b | MX     | N2 |
| TCGA-55-8205 | 599  | 0 | 76     | FEMALE | Stage IIA  | T2b | M0     | N0 |
| TCGA-44-2668 | 761  | 1 | 51     | MALE   | Stage IB   | T2  | M0     | N0 |
| TCGA-NJ-A4YP | 50   | 0 | 52     | MALE   | Stage IB   | T2a | M0     | N0 |
| TCGA-49-4494 | 1081 | 1 | 77     | MALE   | Stage IIIA | T3  | M0     | N2 |
| TCGA-49-AAR9 | 260  | 1 | 61     | MALE   | Stage IIB  | T3  | MX     | N0 |
| TCGA-38-4625 | 2973 | 0 | 66     | FEMALE | Stage IB   | T2a | M0     | N0 |
| TCGA-33-AASD | 2249 | 1 | 83     | MALE   | Stage IA   | T1  | MX     | N0 |
| TCGA-44-7661 | 557  | 1 | 69     | FEMALE | Stage IB   | T2a | M0     | N0 |
| TCGA-NC-A5HK | 128  | 0 | 58     | FEMALE | Stage IIB  | T3  | M0     | N0 |
| TCGA-55-7726 | 652  | 0 | 72     | FEMALE | Stage IA   | T1b | MX     | N0 |
| TCGA-56-7221 | 608  | 0 | 79     | MALE   | Stage IB   | T2  | M0     | N0 |
| TCGA-46-6025 | 324  | 0 | 71     | MALE   | Stage IIB  | T2b | M0     | N1 |
| TCGA-52-7809 | 166  | 1 | 74     | MALE   | Stage IB   | T2  | M0     | N0 |
| TCGA-75-6205 |      | 1 | unknov | FEMALE | Stage IB   | T2a | M0     | N0 |
| TCGA-55-6972 | 1632 | 1 | 72     | MALE   | Stage IB   | T2  | M0     | N0 |
| TCGA-66-2765 | 61   | 0 | 64     | MALE   | Stage IB   | T2  | M0     | N0 |
| TCGA-86-8359 | 444  | 1 | 52     | MALE   | Stage IIIA | T3  | M0     | N2 |
| TCGA-50-6673 | 22   | 1 | 84     | FEMALE | Stage I    | T1  | M0     | N0 |
| TCGA-44-3917 | 1183 | 0 | 33     | FEMALE | Stage IB   | T2  | M0     | N0 |
| TCGA-77-8144 | 833  | 0 | 70     | MALE   | Stage IB   | T2  | M0     | N0 |
| TCGA-95-7567 | 568  | 0 | 61     | MALE   | Stage IIB  | T2b | M0     | N1 |
| TCGA-43-5670 | 849  | 0 | 70     | MALE   | Stage IIA  | T2b | M0     | N0 |
| TCGA-77-8131 | 383  | 1 | 72     | MALE   | Stage IB   | T2  | M0     | NX |
| TCGA-21-A5DI | 979  | 0 | 77     | MALE   | Stage IA   | T1b | M0     | N0 |
| TCGA-97-8176 | 468  | 1 | 63     | MALE   | Stage IIIA | T3  | M0     | N1 |
| TCGA-51-4080 | 12   | 1 | 65     | MALE   | Stage IIIB | T4  | unknov | N1 |
| TCGA-37-A5EM | 867  | 0 | 49     | MALE   | Stage II   | T2  | M0     | N0 |
| TCGA-64-1677 | 628  | 1 | 77     | FEMALE | Stage IIIA | T2  | M0     | N2 |
| TCGA-22-5489 | 1912 | 1 | 64     | MALE   | Stage IA   | T1b | M0     | N0 |
| TCGA-50-5942 | 1847 | 0 | 67     | FEMALE | Stage IA   | T1  | M0     | N0 |
| TCGA-38-4627 | 1147 | 1 | 64     | FEMALE | Stage IIA  | T1b | M0     | N1 |
| TCGA-86-8055 | 124  | 1 | 79     | MALE   | Stage IIA  | T2a | M0     | N1 |
| TCGA-55-A4DF | 440  | 1 | 88     | MALE   | Stage IA   | T1b | MX     | N0 |
| TCGA-44-2664 | 1251 | 0 | 66     | FEMALE | Stage IA   | T1  | M0     | N0 |
| TCGA-44-A47B | 287  | 0 | 79     | MALE   | Stage IB   | T2a | M0     | N0 |
| TCGA-77-A5G7 | 180  | 1 | 63     | MALE   | Stage IA   | T1  | M0     | N0 |
| TCGA-60-2696 | 109  | 1 | 76     | FEMALE | Stage IIA  | T2  | M0     | N0 |
| TCGA-85-A50Z | 493  | 0 | 57     | MALE   | Stage IIA  | T2b | M0     | N0 |
| TCGA-77-6842 | 899  | 1 | 79     | MALE   | Stage IIB  | T2  | M0     | N1 |
| TCGA-85-A4JB | 942  | 0 | 74     | MALE   | Stage IIB  | T3  | M0     | N0 |
| TCGA-66-2771 | 578  | 0 | 60     | MALE   | Stage IIB  | T2  | M0     | N1 |
| TCGA-63-A5MR | 2716 | 0 | 70     | FEMALE | Stage IB   | T2  | M0     | N0 |
| TCGA-62-A46R | 1725 | 1 | 54     | FEMALE | Stage IB   | T2  | M0     | N0 |
| TCGA-68-7756 | 202  | 0 | 84     | MALE   | Stage IIIA | T4  | MX     | N1 |
| TCGA-71-8520 | 210  | 1 | 60     | FEMALE | Stage IB   | T2  | M0     | N0 |
| TCGA-80-5611 | 2595 | 0 | unknov | MALE   | Stage IB   | T2  | M0     | N0 |
| TCGA-05-4250 | 121  | 1 | 79     | FEMALE | Stage IIIA | T3  | M0     | N1 |
| TCGA-78-7158 | 179  | 1 | 59     | FEMALE | Stage IIIB | T4  | M0     | N2 |
| TCGA-53-7813 | 424  | 0 | 51     | FEMALE | Stage IIIB | T4  | M0     | N0 |
| TCGA-55-6970 | 464  | 1 | 67     | FEMALE | Stage IIIA | T2  | MX     | N2 |
| TCGA-96-A4JL | 842  | 0 | 78     | FEMALE | Stage IIA  | T2a | M0     | N1 |
| TCGA-85-8584 | 383  | 1 | 71     | MALE   | Stage IIA  | T2a | M0     | N1 |



|              |      |   |        |        |            |     |        |        |
|--------------|------|---|--------|--------|------------|-----|--------|--------|
| TCGA-73-A9RS | 340  | 1 | 41     | MALE   | Stage IIB  | T3  | M0     | N0     |
| TCGA-22-5472 | 1975 | 1 | 67     | MALE   | Stage IB   | T2a | M0     | N0     |
| TCGA-69-7764 | 414  | 0 | 75     | MALE   | Stage IA   | T1b | M0     | N0     |
| TCGA-18-5595 | 827  | 1 | 50     | MALE   | Stage IB   | T2  | M0     | N0     |
| TCGA-55-8094 | 541  | 0 | 51     | MALE   | Stage IV   | T2b | M1b    | N0     |
| TCGA-95-A4VN | 553  | 0 | 62     | FEMALE | Stage IIA  | T2a | M0     | N1     |
| TCGA-69-8254 | 409  | 0 | 85     | MALE   | unknow     | T2b | unknow | unknow |
| TCGA-49-AAR3 | 1893 | 0 | 69     | MALE   | Stage IIB  | T2  | MX     | N1     |
| TCGA-49-4510 | 896  | 1 | 51     | FEMALE | Stage IIB  | T2  | M0     | N1     |
| TCGA-55-7281 | 872  | 0 | 70     | FEMALE | Stage IA   | T1b | M0     | N0     |
| TCGA-85-8048 | 765  | 0 | 62     | MALE   | Stage IA   | T1  | M0     | N0     |
| TCGA-69-7763 | 690  | 0 | 69     | MALE   | Stage IA   | T1b | M0     | N0     |
| TCGA-60-2698 | 311  | 1 | 62     | MALE   | Stage IIB  | T2  | M0     | N1     |
| TCGA-78-7148 | 626  | 1 | 71     | MALE   | Stage IIB  | T2  | M0     | N1     |
| TCGA-97-A4M7 | 629  | 0 | 74     | MALE   | Stage IA   | T1b | M0     | N0     |
| TCGA-86-8668 | 423  | 0 | 61     | FEMALE | Stage IA   | T1b | M0     | N0     |
| TCGA-85-8288 | 402  | 1 | 70     | MALE   | Stage IIA  | T1b | M0     | N1     |
| TCGA-34-5234 | 2271 | 0 | 71     | FEMALE | Stage IA   | T1  | M0     | N0     |
| TCGA-46-3765 | 405  | 0 | 59     | FEMALE | Stage IA   | T1  | M0     | N0     |
| TCGA-66-2795 | 122  | 0 | 68     | MALE   | Stage IIIB | T4  | M0     | N1     |
| TCGA-LA-A446 | 401  | 0 | 68     | MALE   | Stage IA   | T1b | MX     | N0     |
| TCGA-49-AAQV | 677  | 1 | 63     | FEMALE | Stage II   | T1  | MX     | N1     |
| TCGA-77-7463 | 1423 | 1 | 75     | MALE   | Stage IB   | T2  | M0     | N0     |
| TCGA-71-6725 | 256  | 0 | 48     | FEMALE | Stage IB   | T2  | M0     | N0     |
| TCGA-55-7570 | 824  | 0 | 60     | MALE   | Stage IA   | T1a | MX     | N0     |
| TCGA-05-4402 | 244  | 1 | 57     | FEMALE | Stage IV   | T2  | M1     | NX     |
| TCGA-67-4679 | 448  | 0 | 69     | MALE   | unknow     | T3  | M0     | N0     |
| TCGA-33-AASI | 1344 | 1 | 65     | FEMALE | Stage IIB  | T2  | MX     | N1     |
| TCGA-05-4422 | 365  | 0 | 68     | MALE   | Stage IB   | T2  | M0     | N0     |
| TCGA-22-5473 | 1933 | 1 | 78     | MALE   | unknow     | T3  | M0     | N0     |
| TCGA-55-7227 | 952  | 1 | 77     | MALE   | Stage IIIA | T3  | MX     | N1     |
| TCGA-68-7755 | 83   | 0 | 60     | FEMALE | Stage IIA  | T1b | M0     | N1     |
| TCGA-NC-A5HO | 1336 | 0 | 70     | FEMALE | Stage IIIA | T3  | M0     | N1     |
| TCGA-55-1594 | 1178 | 0 | 68     | MALE   | Stage IIIA | T2  | M0     | N2     |
| TCGA-49-AAR4 | 879  | 1 | 51     | MALE   | Stage IIIA | T2  | MX     | N2     |
| TCGA-18-3407 | 136  | 1 | 72     | MALE   | Stage IB   | T2  | M0     | N0     |
| TCGA-37-4135 | 207  | 0 | 68     | MALE   | Stage IB   | T2a | M0     | N0     |
| TCGA-34-2596 | 80   | 1 | 70     | MALE   | Stage IIB  | T2  | M0     | N1     |
| TCGA-96-7544 | 2160 | 1 | 83     | MALE   | Stage IIB  | T2  | MX     | N1     |
| TCGA-68-7757 | 211  | 0 | 74     | MALE   | Stage IA   | T1b | MX     | N0     |
| TCGA-85-8354 | 995  | 0 | 53     | MALE   | Stage IB   | T2a | M0     | N0     |
| TCGA-62-A46Y | 414  | 1 | 70     | FEMALE | Stage IIIA | T2  | M0     | N2     |
| TCGA-86-8054 | 1148 | 0 | 61     | MALE   | Stage IIB  | T2b | M0     | N1     |
| TCGA-66-2756 | 30   | 0 | 68     | MALE   | Stage IIIB | T4  | M0     | N0     |
| TCGA-62-A46S | 1653 | 1 | 73     | MALE   | Stage IB   | T2  | M0     | N0     |
| TCGA-97-8177 | 499  | 0 | 59     | FEMALE | Stage IB   | T2a | M0     | N0     |
| TCGA-05-5425 | 882  | 0 | 68     | MALE   | Stage IIB  | T2b | M0     | N1     |
| TCGA-49-6744 | 1683 | 0 | 64     | FEMALE | Stage IIA  | T2a | MX     | N1     |
| TCGA-39-5036 | 2165 | 0 | 73     | MALE   | Stage IB   | T2  | M0     | N0     |
| TCGA-44-6778 | 1864 | 0 | 59     | MALE   | Stage IA   | T1  | MX     | N0     |
| TCGA-75-6206 | 2590 | 0 | unknow | MALE   | Stage IB   | T2  | M0     | N0     |
| TCGA-77-A5G6 | 678  | 1 | 66     | MALE   | Stage IIIA | T2  | M0     | N2     |
| TCGA-77-6845 | 708  | 1 | 69     | MALE   | Stage IIB  | T3  | M0     | N0     |
| TCGA-80-5607 |      | 0 | unknow | FEMALE | Stage IIB  | T2  | M0     | N1     |
| TCGA-NJ-A4YF | 2161 | 0 | 50     | FEMALE | Stage IA   | T1  | M0     | N0     |
| TCGA-22-5485 | 916  | 1 | 58     | FEMALE | Stage IA   | T1a | M0     | N0     |
| TCGA-90-6837 | 758  | 0 | 64     | MALE   | Stage IIB  | T3  | MX     | N0     |
| TCGA-78-7220 | 807  | 1 | 53     | FEMALE | Stage IIIA | T2  | M0     | N2     |

|              |      |   |        |        |            |     |    |    |
|--------------|------|---|--------|--------|------------|-----|----|----|
| TCGA-50-6595 | 189  | 1 | 74     | FEMALE | Stage IIIA | T2  | M0 | N2 |
| TCGA-33-4566 | 5287 | 1 | 40     | MALE   | Stage IB   | T2  | M0 | N0 |
| TCGA-46-3766 | 370  | 0 | 62     | FEMALE | Stage IA   | T1  | M0 | N0 |
| TCGA-66-2777 | 61   | 0 | 71     | MALE   | Stage IB   | T2  | M0 | N0 |
| TCGA-78-7167 | 2681 | 1 | 77     | MALE   | Stage IV   | T2  | M1 | N0 |
| TCGA-77-8143 | 803  | 1 | 76     | MALE   | Stage IIIA | T2  | M0 | N2 |
| TCGA-95-7948 | 476  | 0 | 42     | FEMALE | Stage IB   | T2a | M0 | N0 |
| TCGA-90-A4EE | 688  | 0 | 53     | MALE   | Stage IIA  | T2a | MX | N1 |
| TCGA-75-6207 |      | 1 | unknov | MALE   | Stage IIIA | T2  | M0 | N2 |
| TCGA-66-2785 | 60   | 0 | 65     | MALE   | Stage IB   | T2  | M0 | N0 |
| TCGA-05-4389 | 1369 | 0 | 70     | MALE   | Stage IA   | T1  | M0 | N0 |
| TCGA-05-5429 | 275  | 1 | 60     | MALE   | Stage IIIA | T3  | M0 | N2 |
| TCGA-66-2789 | 123  | 1 | 73     | MALE   | Stage IIIB | T1  | M0 | N3 |
| TCGA-NC-A5HJ | 418  | 1 | 59     | MALE   | Stage IIB  | T3  | M0 | N0 |
| TCGA-46-3768 | 299  | 1 | 58     | MALE   | Stage IIIA | T3  | M0 | N1 |
| TCGA-55-7907 | 343  | 1 | 77     | MALE   | Stage IIA  | T2a | MX | N1 |
| TCGA-67-3776 | 61   | 0 | 57     | FEMALE | Stage IIB  | T2  | M0 | N1 |
| TCGA-34-7107 | 34   | 1 | 70     | MALE   | Stage II   | T2a | M0 | N0 |
| TCGA-73-4677 | 38   | 1 | 74     | MALE   | unknow     | T2a | M0 | N0 |
| TCGA-97-8172 | 545  | 0 | 75     | FEMALE | Stage IB   | T2a | M0 | N0 |
| TCGA-77-8009 | 1695 | 1 | 68     | MALE   | Stage IIB  | T2  | M0 | N1 |
| TCGA-75-5147 | 1333 | 0 | unknov | FEMALE | Stage IB   | T2  | M0 | N0 |
| TCGA-50-5045 | 2174 | 1 | 57     | FEMALE | unknow     | T2  | M0 | N1 |
| TCGA-44-A4SU | 409  | 1 | 67     | FEMALE | Stage IA   | T1a | MX | N0 |
| TCGA-55-8301 | 534  | 0 | 58     | MALE   | Stage IB   | T2a | MX | N0 |
| TCGA-55-1596 | 2065 | 0 | 55     | MALE   | Stage IIB  | T2  | M0 | N1 |
| TCGA-98-A539 | 173  | 0 | 63     | MALE   | Stage IIB  | T3  | M0 | N0 |
| TCGA-63-A5MS | 2381 | 0 | 78     | MALE   | Stage IB   | T2  | M0 | N0 |
| TCGA-60-2714 | 1531 | 0 | 66     | FEMALE | Stage IIB  | T2  | M0 | N1 |
| TCGA-33-4533 | 4068 | 0 | 76     | FEMALE | Stage IB   | T2  | M0 | N0 |
| TCGA-55-A4DG | 608  | 0 | 71     | MALE   | Stage IA   | T1b | MX | N0 |
| TCGA-49-AARE | 1229 | 1 | 51     | FEMALE | Stage IA   | T1  | MX | N0 |
| TCGA-50-6592 | 777  | 1 | 71     | FEMALE | Stage IB   | T2  | M0 | N0 |
| TCGA-J2-A4AG | 988  | 0 | 66     | FEMALE | Stage IA   | T1b | MX | N0 |
| TCGA-67-3771 | 610  | 0 | 77     | FEMALE | Stage IA   | T1  | M0 | N0 |
| TCGA-73-4662 | 2515 | 0 | 65     | FEMALE | Stage IA   | T1  | M0 | N0 |
| TCGA-05-5420 | 457  | 0 | 67     | MALE   | Stage IIIA | T2  | M0 | N2 |
| TCGA-18-3412 | 345  | 1 | 52     | MALE   | Stage IB   | T2  | M0 | N0 |
| TCGA-86-8056 | 139  | 0 | 63     | FEMALE | Stage IIIA | T4  | M0 | N0 |
| TCGA-43-3394 | 1190 | 1 | 52     | MALE   | Stage IB   | T2a | M0 | N0 |
| TCGA-J2-A4AE | 1079 | 0 | 77     | FEMALE | Stage IA   | T1a | MX | N0 |
| TCGA-44-7669 | 574  | 1 | 59     | MALE   | Stage IIA  | T1b | MX | N1 |
| TCGA-44-8119 | 285  | 0 | 73     | MALE   | Stage IIB  | T3  | M0 | N0 |
| TCGA-50-5941 | 1474 | 0 | 55     | FEMALE | Stage IIIA | T2a | M0 | N2 |
| TCGA-33-4586 | 428  | 1 | 57     | MALE   | Stage IIIA | T2  | M0 | N2 |
| TCGA-92-7340 | 82   | 0 | 45     | FEMALE | Stage IIA  | T2a | MX | N1 |
| TCGA-64-5781 | 1559 | 0 | 55     | FEMALE | Stage IB   | T2  | M0 | N0 |
| TCGA-58-A46L | 1723 | 0 | 73     | MALE   | Stage IIIA | T2  | M0 | N2 |
| TCGA-85-7697 | 1063 | 0 | 49     | MALE   | Stage IIB  | T3  | M0 | N0 |
| TCGA-73-4666 | 800  | 0 | 52     | FEMALE | Stage IV   | T1  | M1 | N0 |
| TCGA-85-A4CL | 921  | 1 | 65     | MALE   | Stage IA   | T1b | M0 | N0 |
| TCGA-60-2706 | 2820 | 0 | 58     | MALE   | Stage IA   | T1  | M0 | N0 |
| TCGA-22-0940 | 669  | 1 | 71     | MALE   | Stage IIA  | T1  | M0 | N1 |
| TCGA-56-7823 | 1011 | 0 | 58     | FEMALE | Stage IIA  | T1b | M0 | N1 |
| TCGA-98-A53D | 645  | 1 | 68     | MALE   | Stage IIB  | T3  | M0 | N0 |
| TCGA-L9-A8F4 | 476  | 0 | 64     | FEMALE | Stage IB   | T2a | MX | N0 |
| TCGA-69-8253 | 426  | 0 | 59     | FEMALE | Stage IIA  | T1a | MX | N1 |
| TCGA-97-8552 | 626  | 0 | 55     | FEMALE | Stage I    | T1a | MX | N0 |

|              |      |   |        |        |            |     |     |    |
|--------------|------|---|--------|--------|------------|-----|-----|----|
| TCGA-77-7337 | 3253 | 1 | 65     | MALE   | Stage IIB  | T2  | M0  | N1 |
| TCGA-44-6776 | 2616 | 0 | 60     | FEMALE | Stage IA   | T1  | MX  | N0 |
| TCGA-L9-A5IP | 58   | 1 | 40     | FEMALE | Stage IV   | T3  | M1b | N2 |
| TCGA-44-6148 | 704  | 0 | 60     | MALE   | Stage IA   | T1b | M0  | N0 |
| TCGA-38-4630 | 1073 | 1 | 75     | FEMALE | Stage IB   | T2  | M0  | N0 |
| TCGA-95-7947 | 477  | 0 | 67     | MALE   | Stage IA   | T1a | M0  | N0 |
| TCGA-51-4081 | 911  | 0 | 55     | MALE   | Stage IIB  | T2a | M0  | N1 |
| TCGA-4B-A93V | 300  | 1 | 52     | FEMALE | Stage IA   | T1b | M0  | N0 |
| TCGA-98-8023 | 649  | 0 | 70     | MALE   | Stage IIIA | T3  | M0  | N1 |
| TCGA-34-2605 | 881  | 1 | 76     | MALE   | Stage IIIB | T4  | M0  | N1 |
| TCGA-56-1622 | 881  | 1 | 58     | MALE   | Stage IB   | T2  | M0  | N0 |
| TCGA-86-8076 | 993  | 0 | 42     | MALE   | Stage IA   | T1  | M0  | N0 |
| TCGA-77-8139 | 3166 | 0 | 72     | MALE   | Stage IIB  | T3  | M0  | N0 |
| TCGA-66-2758 | 639  | 0 | 71     | MALE   | Stage IB   | T2  | M0  | N0 |
| TCGA-05-4410 | 0    | 0 | 62     | MALE   | Stage IB   | T2  | M0  | N0 |
| TCGA-62-A472 | 910  | 0 | 70     | MALE   | Stage IIB  | T3  | M0  | N0 |
| TCGA-NC-A5HT | 804  | 0 | 69     | MALE   | Stage IIIA | T3  | M0  | N1 |
| TCGA-55-6968 | 1293 | 1 | 61     | MALE   | Stage IV   | T1  | M1  | N0 |
| TCGA-56-8622 | 55   | 0 | 68     | MALE   | Stage IB   | T2a | M0  | N0 |
| TCGA-55-8514 | 520  | 0 | 70     | FEMALE | Stage IB   | T2a | MX  | N0 |
| TCGA-22-1000 | 454  | 1 | 76     | MALE   | Stage IB   | T2  | M0  | N0 |
| TCGA-75-7031 |      | 0 | unknov | FEMALE | Stage IB   | T2  | M0  | N0 |
| TCGA-62-8397 | 1289 | 0 | 70     | FEMALE | Stage IIB  | T3  | M0  | N0 |
| TCGA-86-7953 | 997  | 0 | 69     | FEMALE | Stage IA   | T1b | M0  | N0 |
| TCGA-75-5146 | 2368 | 0 | unknov | MALE   | Stage IB   | T2  | M0  | N0 |
| TCGA-NK-A5CR | 2542 | 0 | 77     | MALE   | Stage IB   | T2  | MX  | N0 |
| TCGA-44-A47G | 351  | 0 | 73     | FEMALE | Stage IA   | T1  | M0  | N0 |
| TCGA-86-8671 | 839  | 0 | 72     | FEMALE | Stage IIB  | T2b | M0  | N1 |
| TCGA-86-8358 | 653  | 0 | 44     | MALE   | Stage IB   | T2a | M0  | N0 |
| TCGA-56-8623 | 692  | 1 | 71     | MALE   | Stage IB   | T2a | MX  | N0 |
| TCGA-93-A4JN | 718  | 0 | 71     | MALE   | Stage IV   | T2a | M1a | N0 |
| TCGA-05-4432 | 761  | 0 | 66     | MALE   | Stage IIB  | T2  | M0  | N1 |
| TCGA-92-7341 | 106  | 0 | 71     | MALE   | Stage IB   | T2a | MX  | N0 |
| TCGA-56-8629 | 481  | 0 | 63     | MALE   | Stage IIA  | T2b | MX  | N0 |
| TCGA-86-8669 | 938  | 0 | 64     | MALE   | Stage IA   | T1b | M0  | N0 |
| TCGA-95-A4VK | 651  | 0 | 74     | FEMALE | Stage IIIA | T2b | M0  | N2 |
| TCGA-22-1002 | 131  | 1 | 69     | MALE   | Stage IA   | T1  | M0  | N0 |
| TCGA-44-7670 | 882  | 0 | 47     | FEMALE | Stage IIA  | T1b | M0  | N1 |
| TCGA-73-7499 | 1531 | 1 | 81     | FEMALE | Stage IB   | T2a | M0  | N0 |
| TCGA-62-A46U | 2067 | 0 | 71     | FEMALE | Stage IIB  | T2  | M0  | N1 |
| TCGA-77-6844 | 2284 | 1 | 74     | MALE   | Stage IIIA | T3  | M0  | N1 |
| TCGA-55-8508 | 617  | 0 | 60     | FEMALE | Stage IIA  | T2a | MX  | N1 |
| TCGA-21-1076 | 1852 | 0 | 54     | FEMALE | Stage IB   | T2  | M0  | N0 |
| TCGA-56-8504 | 510  | 0 | 74     | MALE   | Stage IB   | T2a | MX  | N0 |
| TCGA-44-2657 | 1351 | 0 | 74     | FEMALE | Stage IB   | T2  | M0  | NX |
| TCGA-56-7731 | 3    | 1 | 66     | FEMALE | Stage IB   | T2a | MX  | N0 |
| TCGA-97-8171 | 568  | 0 | 81     | MALE   | Stage IV   | T2a | M1a | N2 |
| TCGA-50-5944 | 1750 | 0 | 69     | FEMALE | Stage IA   | T1  | M0  | N0 |
| TCGA-77-6843 | 2224 | 1 | 74     | MALE   | Stage IIA  | T1  | M0  | N1 |
| TCGA-21-5782 | 962  | 1 | 68     | FEMALE | Stage IB   | T2  | M0  | N0 |
| TCGA-78-7633 | 1528 | 1 | 67     | MALE   | Stage IB   | T2  | M0  | N0 |
| TCGA-64-5775 | 62   | 1 | 71     | MALE   | Stage IIIA | T4  | M0  | N0 |
| TCGA-J2-8194 | 724  | 0 | 69     | FEMALE | Stage IIB  | T3  | MX  | N0 |
| TCGA-78-7539 | 791  | 0 | 75     | FEMALE | Stage IIA  | T2b | M0  | N0 |
| TCGA-90-A4ED | 615  | 0 | 69     | MALE   | Stage IB   | T2a | MX  | N0 |
| TCGA-43-2576 | 1223 | 0 | 62     | FEMALE | Stage IIIA | T2  | M0  | N2 |
| TCGA-91-6829 | 1258 | 1 | 78     | MALE   | Stage IB   | T2  | MX  | N0 |
| TCGA-99-8028 | 1118 | 0 | 50     | FEMALE | Stage IA   | T1a | M0  | N0 |

|              |      |   |    |        |            |     |        |    |
|--------------|------|---|----|--------|------------|-----|--------|----|
| TCGA-78-7153 | 3635 | 0 | 65 | FEMALE | Stage IB   | T2  | M0     | N0 |
| TCGA-18-3417 | 1097 | 1 | 65 | MALE   | Stage IV   | T2  | M1     | N1 |
| TCGA-66-2800 | 1492 | 0 | 70 | MALE   | Stage IIIB | T4  | M0     | N0 |
| TCGA-L9-A50W | 442  | 1 | 75 | MALE   | Stage IIA  | T1b | MX     | N1 |
| TCGA-21-1070 | 3636 | 0 | 60 | FEMALE | Stage IIIA | T3  | M0     | N0 |
| TCGA-63-A5MV | 1100 | 0 | 69 | MALE   | Stage IIA  | T2b | M0     | N0 |
| TCGA-50-6594 | 370  | 1 | 79 | FEMALE | Stage IIIA | T3  | M0     | N2 |
| TCGA-66-2793 | 306  | 1 | 68 | MALE   | Stage IIIB | T4  | M0     | N1 |
| TCGA-33-4587 | 1656 | 1 | 63 | FEMALE | Stage IB   | T2  | MX     | N0 |
| TCGA-33-6737 | 601  | 1 | 71 | MALE   | Stage IIIA | T2  | M0     | N2 |
| TCGA-50-5936 | 257  | 1 | 58 | MALE   | Stage IIIA | T2  | M0     | N2 |
| TCGA-77-8136 | 1189 | 1 | 74 | FEMALE | Stage IIB  | T2  | M0     | N1 |
| TCGA-85-7699 | 1001 | 1 | 73 | MALE   | Stage IIIA | T4  | M0     | N0 |
| TCGA-66-2727 | 516  | 1 | 55 | FEMALE | Stage IB   | T2  | M0     | N0 |
| TCGA-05-5428 | 670  | 0 | 57 | MALE   | Stage IIA  | T1b | M0     | N1 |
| TCGA-55-5899 | 930  | 0 | 58 | MALE   | unknow     | T1a | M0     | N1 |
| TCGA-85-A513 | 910  | 0 | 60 | FEMALE | Stage IA   | T1a | M0     | NX |
| TCGA-44-7659 | 691  | 0 | 70 | MALE   | Stage IA   | T1b | MX     | N0 |
| TCGA-55-7816 | 468  | 1 | 49 | FEMALE | Stage IV   | TX  | MX     | NX |
| TCGA-85-8479 | 468  | 0 | 66 | MALE   | Stage IA   | T1a | M0     | N0 |
| TCGA-05-4425 | 669  | 0 | 70 | FEMALE | Stage IV   | T2  | M1     | N0 |
| TCGA-44-2665 | 1301 | 0 | 55 | FEMALE | Stage IIB  | T2  | M0     | N1 |
| TCGA-22-4609 | 291  | 1 | 81 | MALE   | Stage IA   | T1  | M0     | N0 |
| TCGA-05-4424 | 913  | 0 | 70 | MALE   | Stage IIB  | T3  | M0     | N0 |
| TCGA-78-7156 | 976  | 1 | 62 | MALE   | Stage IV   | T4  | M1     | N1 |
| TCGA-39-5027 | 3108 | 0 | 73 | MALE   | Stage IB   | T2a | M0     | N0 |
| TCGA-92-8063 | 122  | 0 | 52 | MALE   | Stage IIIA | T2b | MX     | N2 |
| TCGA-49-4512 | 905  | 1 | 69 | FEMALE | Stage IIIA | T2  | MX     | N2 |
| TCGA-78-7536 | 244  | 1 | 69 | MALE   | Stage IIIA | T2  | M0     | N2 |
| TCGA-60-2723 | 1092 | 0 | 74 | FEMALE | Stage IB   | T2  | M0     | N0 |
| TCGA-97-8175 | 551  | 0 | 55 | FEMALE | Stage IB   | T2a | M0     | N0 |
| TCGA-34-5236 | 276  | 1 | 60 | MALE   | Stage IIB  | T3  | M0     | N0 |
| TCGA-37-3789 | 13   | 0 | 65 | MALE   | Stage IB   | T2  | unknow | N0 |
| TCGA-49-4501 | 1421 | 1 | 67 | FEMALE | Stage IB   | T2  | M0     | N0 |
| TCGA-63-A5MG | 2148 | 0 | 68 | MALE   | Stage IB   | T2  | M0     | N0 |
| TCGA-33-A4WN | 143  | 1 | 60 | MALE   | Stage IB   | T2a | MX     | N0 |
| TCGA-53-7626 | 929  | 1 | 76 | FEMALE | Stage IIA  | T1  | M0     | N1 |
| TCGA-55-6984 | 760  | 1 | 71 | FEMALE | Stage IIB  | T2  | M0     | N1 |
| TCGA-44-2659 | 1367 | 0 | 65 | FEMALE | Stage IIB  | T1  | M0     | N1 |
| TCGA-MP-A4SW | 1778 | 1 | 53 | MALE   | Stage IIB  | T2  | M0     | N1 |
| TCGA-94-A5I6 | 538  | 0 | 62 | MALE   | Stage IIB  | T3  | M0     | N0 |
| TCGA-85-8664 | 550  | 1 | 73 | MALE   | Stage IIB  | T2b | M0     | N1 |
| TCGA-22-4596 | 17   | 1 | 69 | FEMALE | Stage IB   | T1b | M0     | N0 |
| TCGA-39-5029 | 740  | 1 | 67 | MALE   | Stage IIIA | T1b | M0     | N2 |
| TCGA-43-2581 | 1176 | 0 | 47 | FEMALE | Stage IIIA | T3  | M0     | N1 |
| TCGA-55-A48X | 689  | 0 | 63 | FEMALE | Stage IIA  | T1b | M0     | N1 |
| TCGA-55-1592 | 701  | 1 | 65 | MALE   | Stage IA   | T2  | M0     | N0 |
| TCGA-86-8673 | 862  | 0 | 61 | MALE   | Stage IB   | T2  | M0     | N0 |
| TCGA-94-A4VJ | 430  | 0 | 71 | FEMALE | Stage IA   | T1b | M0     | N0 |
| TCGA-NC-A5HN | 1499 | 0 | 77 | MALE   | Stage IIA  | T2a | M0     | N1 |
| TCGA-35-4123 | 182  | 0 | 38 | MALE   | Stage IA   | T1  | M0     | N0 |
| TCGA-39-5037 | 1690 | 0 | 65 | MALE   | Stage IIA  | T1b | M0     | N1 |
| TCGA-78-8640 | 7062 | 0 | 59 | MALE   | Stage IIA  | T1  | M0     | N1 |
| TCGA-60-2726 | 358  | 1 | 56 | MALE   | Stage IIA  | T2  | M0     | N1 |
| TCGA-98-A53J | 630  | 0 | 77 | MALE   | Stage IB   | T2a | M0     | N0 |
| TCGA-66-2737 | 61   | 0 | 72 | MALE   | Stage IIB  | T2  | M0     | N1 |
| TCGA-56-A4ZK | 570  | 0 | 76 | FEMALE | Stage IB   | T2  | M0     | N0 |
| TCGA-77-A5GA | 1280 | 0 | 76 | MALE   | Stage IB   | T2a | M0     | N0 |

|              |      |   |        |        |            |     |     |    |
|--------------|------|---|--------|--------|------------|-----|-----|----|
| TCGA-75-7027 | 3059 | 0 | unknov | MALE   | Stage IB   | T2  | M0  | N0 |
| TCGA-60-2703 | 2945 | 1 | 73     | MALE   | Stage IIB  | T2  | M0  | N1 |
| TCGA-22-5481 | 2409 | 1 | 72     | FEMALE | Stage IIB  | T2  | M0  | N1 |
| TCGA-22-4613 | 358  | 1 | 73     | FEMALE | Stage IA   | T1b | M0  | N0 |
| TCGA-56-A5DR | 4    | 0 | 81     | MALE   | Stage IA   | T1a | MX  | N0 |
| TCGA-77-7141 | 15   | 0 | 64     | MALE   | Stage IB   | T2  | M0  | N0 |
| TCGA-99-8032 | 44   | 0 | 61     | MALE   | Stage IA   | T1a | M0  | N0 |
| TCGA-49-6761 | 354  | 0 | 68     | FEMALE | Stage IIIA | T1  | MX  | N2 |
| TCGA-58-A46N | 910  | 0 | 52     | MALE   | Stage IB   | T2a | M0  | N0 |
| TCGA-63-A5MP | 769  | 0 | 56     | MALE   | Stage IIB  | T2  | M0  | N1 |
| TCGA-MP-A4SY | 1501 | 1 | 61     | MALE   | Stage IIB  | T2  | M0  | N1 |
| TCGA-43-7658 | 2378 | 1 | 75     | FEMALE | Stage IA   | T1  | M0  | N0 |
| TCGA-43-A56U | 432  | 0 | 76     | FEMALE | Stage IA   | T1b | MX  | N0 |
| TCGA-L3-A4E7 | 392  | 0 | 71     | MALE   | Stage IB   | T2a | M0  | N0 |
| TCGA-55-A490 | 99   | 1 | 78     | MALE   | Stage IIA  | T2b | MX  | N0 |
| TCGA-93-7348 | 531  | 0 | 75     | FEMALE | Stage IA   | T1a | MX  | N0 |
| TCGA-49-AAR0 | 4765 | 0 | 57     | MALE   | Stage IA   | T1  | MX  | N0 |
| TCGA-93-A4JP | 578  | 0 | 64     | MALE   | Stage IV   | TX  | M1b | NX |
| TCGA-56-7730 | 198  | 1 | 73     | MALE   | Stage IIA  | T2b | M0  | N0 |
| TCGA-22-4605 | 974  | 1 | 78     | FEMALE | Stage IB   | T2  | M0  | N0 |
| TCGA-55-6979 | 237  | 1 | 59     | FEMALE | Stage IIB  | T2  | M0  | N1 |
| TCGA-73-7498 | 1189 | 0 | 58     | FEMALE | Stage IA   | T1b | M0  | N0 |
| TCGA-MP-A4T8 | 161  | 1 | 68     | MALE   | Stage IIIA | T2  | M0  | N2 |
| TCGA-50-6590 | 1288 | 1 | 72     | FEMALE | Stage IB   | T2  | M0  | N0 |
| TCGA-56-8626 | 302  | 1 | 59     | MALE   | Stage IA   | T1a | MX  | N0 |
| TCGA-85-8355 | 61   | 0 | 63     | MALE   | Stage IA   | T1a | M0  | N0 |
| TCGA-90-7769 | 358  | 0 | 55     | MALE   | Stage IIB  | T2b | MX  | N1 |
| TCGA-43-6771 | 166  | 1 | 85     | MALE   | Stage IB   | T2  | MX  | N0 |
| TCGA-64-5815 | 866  | 0 | 74     | MALE   | Stage IIB  | T2  | M0  | N1 |
| TCGA-78-7540 | 1197 | 1 | 66     | FEMALE | Stage IB   | T2  | M0  | N0 |
| TCGA-63-7021 | 2142 | 0 | unknov | MALE   | Stage IA   | T1  | M0  | N0 |
| TCGA-34-5928 | 1196 | 0 | 83     | FEMALE | Stage IIB  | T2  | M0  | N1 |
| TCGA-55-8510 | 539  | 0 | 55     | FEMALE | Stage IB   | T2a | MX  | N0 |
| TCGA-44-7671 | 889  | 0 | 64     | MALE   | Stage IB   | T2a | M0  | N0 |
| TCGA-60-2704 | 1154 | 1 | 73     | MALE   | Stage IIB  | T2  | M0  | N1 |
| TCGA-56-8308 | 517  | 0 | 79     | MALE   | Stage IIB  | T3  | MX  | N0 |
| TCGA-85-8070 | 960  | 0 | 71     | MALE   | Stage IB   | T2  | M0  | N0 |
| TCGA-91-8496 | 505  | 0 | 63     | FEMALE | Stage IB   | T2a | MX  | NX |
| TCGA-55-8089 | 702  | 1 | 56     | MALE   | Stage IA   | T1a | M0  | N0 |
| TCGA-NC-A5HM | 1212 | 0 | 76     | MALE   | Stage IB   | T2a | M0  | N0 |
| TCGA-99-AA5R | 658  | 0 | 70     | FEMALE | Stage IA   | T1a | M0  | N0 |
| TCGA-33-6738 | 1927 | 0 | 80     | MALE   | Stage IIIA | T1  | MX  | N2 |
| TCGA-43-A475 | 296  | 0 | 67     | FEMALE | Stage IIB  | T3  | M0  | N0 |
| TCGA-55-8505 | 440  | 0 | 62     | MALE   | Stage IIIA | T1a | MX  | N2 |
| TCGA-05-5423 | 151  | 0 | 65     | MALE   | Stage IIB  | T2  | M0  | N1 |
| TCGA-55-8614 | 536  | 0 | 76     | MALE   | Stage IB   | T2a | MX  | N0 |
| TCGA-50-5946 | 1617 | 0 | 62     | MALE   | Stage IA   | T1  | MX  | N0 |
| TCGA-NC-A5HF | 138  | 1 | 74     | MALE   | Stage IIIB | T4  | MX  | N0 |
| TCGA-NC-A5HP | 770  | 1 | 69     | MALE   | Stage IV   | T2a | M1b | N0 |
| TCGA-94-A5I4 | 491  | 0 | 61     | MALE   | Stage IIA  | T2a | MX  | N1 |
| TCGA-90-7767 | 89   | 0 | 56     | MALE   | Stage IIB  | T2b | MX  | N1 |
| TCGA-05-4245 | 730  | 0 | 81     | MALE   | Stage IIIA | T2  | M0  | N2 |
| TCGA-66-2792 | 913  | 0 | 58     | MALE   | Stage IIB  | T2  | M0  | N1 |
| TCGA-77-8133 | 1640 | 1 | 74     | MALE   | Stage IIA  | T1  | M0  | N1 |
| TCGA-18-3411 | 3576 | 0 | 63     | FEMALE | Stage IIIA | T2  | M0  | N2 |
| TCGA-91-A4BD | 603  | 0 | 78     | MALE   | Stage IIA  | T1b | MX  | N1 |
| TCGA-33-A5GW | 9    | 0 | 67     | MALE   | Stage IIA  | T1a | MX  | N1 |
| TCGA-55-8512 | 607  | 1 | 41     | MALE   | Stage IV   | T1a | M1b | N1 |

|              |      |   |    |        |            |     |     |    |
|--------------|------|---|----|--------|------------|-----|-----|----|
| TCGA-NJ-A55A | 15   | 0 | 76 | FEMALE | Stage IB   | T2  | M0  | N0 |
| TCGA-05-4434 | 457  | 1 | 67 | FEMALE | Stage IV   | T4  | M1  | N1 |
| TCGA-97-A4M6 | 568  | 0 | 45 | FEMALE | Stage IA   | T1a | M0  | N0 |
| TCGA-86-7954 | 605  | 0 | 68 | FEMALE | Stage IB   | T2  | M0  | N0 |
| TCGA-18-4086 | 85   | 1 | 64 | MALE   | Stage IB   | T2  | M0  | N0 |
| TCGA-43-A474 | 353  | 0 | 66 | MALE   | Stage IIA  | T2b | M0  | N0 |
| TCGA-XC-AA0X | 6    | 1 | 77 | FEMALE | Stage IA   | T1a | M0  | N0 |
| TCGA-34-8455 | 123  | 1 | 67 | MALE   | Stage IV   | T4  | M1a | N0 |
| TCGA-78-7150 | 666  | 1 | 59 | MALE   | Stage IIB  | T2  | M0  | N1 |
| TCGA-33-4532 | 3924 | 1 | 68 | MALE   | Stage IB   | T2  | M0  | N0 |
| TCGA-39-5011 | 4053 | 0 | 70 | FEMALE | Stage IA   | T1b | M0  | N0 |
| TCGA-56-A62T | 440  | 0 | 78 | MALE   | Stage IIA  | T2b | MX  | N0 |
| TCGA-62-A470 | 1194 | 1 | 84 | MALE   | Stage IB   | T2  | M0  | N0 |
| TCGA-37-4130 | 247  | 0 | 56 | MALE   | Stage IA   | T1b | M0  | N0 |
| TCGA-69-8255 | 129  | 0 | 71 | MALE   | Stage IA   | T1a | M0  | N0 |
| TCGA-55-8208 | 674  | 0 | 73 | FEMALE | Stage IA   | T1b | M0  | N0 |
| TCGA-96-8169 | 557  | 0 | 67 | FEMALE | Stage IA   | T1a | M0  | N0 |
| TCGA-34-5927 | 1361 | 0 | 70 | FEMALE | Stage IA   | T1  | M0  | N0 |
| TCGA-50-5051 | 478  | 1 | 42 | FEMALE | Stage IIIA | T2  | M0  | N2 |
| TCGA-22-5482 | 357  | 1 | 81 | MALE   | Stage IB   | T2a | M0  | N0 |
| TCGA-55-7910 | 1040 | 0 | 50 | FEMALE | Stage IIA  | T2b | M0  | N0 |
| TCGA-85-A4JC | 604  | 1 | 84 | MALE   | Stage IIA  | T2b | M0  | N0 |
| TCGA-85-A50M | 826  | 1 | 47 | MALE   | Stage IIA  | T2b | M0  | N0 |
| TCGA-38-7271 | 800  | 1 | 72 | FEMALE | Stage IA   | T1  | M0  | N0 |
| TCGA-22-A5C4 | 671  | 0 | 70 | MALE   | Stage IIA  | T2b | M0  | N0 |
| TCGA-86-8585 | 353  | 0 | 57 | MALE   | Stage IB   | T2a | M0  | N0 |
| TCGA-85-8276 | 1050 | 0 | 62 | MALE   | Stage IIA  | T1b | M0  | N1 |
| TCGA-60-2711 | 1260 | 0 | 64 | FEMALE | Stage IB   | T2  | M0  | N0 |
| TCGA-43-3920 | 1007 | 0 | 71 | MALE   | Stage IB   | T2  | M0  | N0 |
| TCGA-86-8075 | 694  | 1 | 66 | FEMALE | Stage IB   | T2  | M0  | N0 |
| TCGA-56-8503 | 41   | 0 | 76 | FEMALE | Stage IIB  | T3  | M0  | N0 |
| TCGA-56-A4BW | 585  | 0 | 55 | MALE   | Stage IIA  | T2a | M0  | N1 |
| TCGA-33-4538 | 2979 | 1 | 66 | MALE   | Stage IIIA | T2  | M0  | N2 |
| TCGA-39-5022 | 1679 | 1 | 76 | MALE   | Stage IB   | T2a | M0  | N0 |
| TCGA-98-8020 | 84   | 1 | 56 | FEMALE | Stage IIIA | T2  | M0  | N2 |
| TCGA-73-4676 | 281  | 1 | 45 | MALE   | Stage IIA  | T2a | M0  | N1 |
| TCGA-50-5933 | 2393 | 1 | 72 | MALE   | Stage IIIB | T4  | M0  | N2 |
| TCGA-22-4594 | 1470 | 1 | 60 | FEMALE | Stage IIIA | T3  | M0  | N2 |
| TCGA-33-AASB | 211  | 1 | 66 | MALE   | Stage IB   | T2  | MX  | N0 |
| TCGA-73-4675 | 922  | 1 | 59 | MALE   | Stage IIIA | T3  | M0  | N1 |
| TCGA-37-3783 | 122  | 0 | 51 | MALE   | Stage IIIA | T3  | M0  | N2 |
| TCGA-92-8064 | 160  | 0 | 58 | MALE   | unknow     | T2b | MX  | N0 |
| TCGA-NC-A5HI | 1743 | 0 | 68 | FEMALE | Stage IB   | T2  | M0  | N0 |
| TCGA-NC-A5HD | 2    | 1 | 79 | MALE   | Stage IIB  | T3  | M0  | N0 |
| TCGA-55-6987 | 2137 | 0 | 77 | MALE   | Stage IA   | T1  | M0  | N0 |
| TCGA-39-5030 | 59   | 1 | 81 | FEMALE | Stage IIIA | T2a | M0  | N2 |
| TCGA-50-5055 | 1830 | 1 | 79 | FEMALE | Stage IIA  | T1  | M0  | N1 |
| TCGA-98-A53I | 565  | 0 | 64 | MALE   | Stage IIA  | T2a | M0  | N1 |
| TCGA-MN-A4N5 | 84   | 0 | 63 | MALE   | Stage IA   | T1a | M0  | N0 |
| TCGA-43-7657 | 236  | 0 | 68 | FEMALE | Stage IA   | T1  | MX  | N0 |
| TCGA-38-A44F | 133  | 0 | 80 | MALE   | Stage IB   | T2a | M0  | N0 |
| TCGA-55-6971 | 1400 | 0 | 59 | FEMALE | Stage IB   | T2  | MX  | N0 |
| TCGA-69-7974 | 184  | 0 | 54 | FEMALE | Stage IIIA | T2a | MX  | N2 |
| TCGA-44-6779 | 500  | 1 | 50 | FEMALE | Stage IIB  | T2  | MX  | N1 |
| TCGA-MP-A4TC | 74   | 1 | 77 | MALE   | Stage IIIA | T1  | M0  | N2 |
| TCGA-55-8302 | 478  | 0 | 54 | MALE   | Stage IB   | T2  | MX  | N0 |
| TCGA-67-3774 | 385  | 0 | 73 | FEMALE | Stage IB   | T2  | M0  | N0 |
| TCGA-55-A493 | 28   | 0 | 54 | FEMALE | Stage IB   | T2a | M0  | N0 |

|              |      |   |        |        |            |     |    |    |
|--------------|------|---|--------|--------|------------|-----|----|----|
| TCGA-77-8148 | 2023 | 0 | 68     | MALE   | Stage IIIA | T3  | M0 | N1 |
| TCGA-66-2767 | 61   | 0 | 62     | MALE   | Stage IIIB | T2  | M0 | N3 |
| TCGA-50-7109 | 308  | 1 | 60     | MALE   | Stage IA   | T1  | M0 | N0 |
| TCGA-55-6982 | 995  | 1 | 79     | FEMALE | Stage IIB  | T2  | M0 | N1 |
| TCGA-85-A4CN | 1038 | 0 | 56     | FEMALE | Stage IIB  | T2b | M0 | N1 |
| TCGA-86-8074 | 24   | 0 | 62     | FEMALE | Stage IIA  | T1b | M0 | N1 |
| TCGA-69-A59K | 591  | 0 | 60     | FEMALE | Stage IIB  | T3  | M0 | N0 |
| TCGA-55-8090 | 598  | 1 | 80     | MALE   | Stage IA   | T1a | M0 | N0 |
| TCGA-77-7139 | 4261 | 0 | 56     | MALE   | Stage IIB  | T2  | M0 | N1 |
| TCGA-O2-A52W | 261  | 1 | 63     | MALE   | Stage I    | T2  | MX | N0 |
| TCGA-63-A5MW | 1639 | 0 | 76     | MALE   | Stage IB   | T2  | M0 | N0 |
| TCGA-97-A4M2 | 624  | 0 | 66     | MALE   | Stage IA   | T1a | M0 | N0 |
| TCGA-MP-A4T9 | 1265 | 1 | 54     | FEMALE | Stage IIIA | T2  | MX | N2 |
| TCGA-66-2770 | 700  | 0 | 79     | MALE   | Stage IB   | T2  | M0 | N0 |
| TCGA-MP-A4TK | 582  | 1 | 56     | FEMALE | Stage IIB  | T2  | MX | N1 |
| TCGA-91-6849 | 35   | 0 | 75     | FEMALE | Stage IIIA | T2  | MX | N2 |
| TCGA-50-6593 | 336  | 1 | 49     | FEMALE | Stage IIIA | T1  | M0 | N2 |
| TCGA-66-2754 | 61   | 0 | 67     | MALE   | Stage IIIA | T2  | M0 | N2 |
| TCGA-95-7043 | 503  | 1 | 63     | FEMALE | Stage IA   | T1a | MX | N0 |
| TCGA-55-7724 | 705  | 0 | 76     | FEMALE | Stage IB   | T2a | MX | N0 |
| TCGA-53-A4EZ | 1071 | 0 | 63     | MALE   | Stage IIA  | T2a | MX | N1 |
| TCGA-18-3410 | 146  | 1 | 81     | MALE   | Stage IIB  | T3  | M0 | N0 |
| TCGA-44-7667 | 1097 | 0 | 49     | FEMALE | Stage IIB  | T3  | MX | N0 |
| TCGA-77-7338 | 5    | 1 | 64     | MALE   | Stage IB   | T2  | M0 | N0 |
| TCGA-44-8117 | 385  | 0 | 54     | FEMALE | Stage IB   | T2a | M0 | N0 |
| TCGA-55-6983 | 2823 | 0 | 81     | MALE   | Stage IIB  | T2  | M0 | N1 |
| TCGA-85-7844 | 911  | 0 | 71     | MALE   | Stage IB   | T2a | M0 | N0 |
| TCGA-92-8065 | 70   | 0 | 74     | FEMALE | Stage IIB  | T3  | MX | N0 |
| TCGA-44-6146 | 728  | 0 | 64     | MALE   | Stage IIB  | T3  | M0 | N0 |
| TCGA-55-8513 | 791  | 0 | 77     | FEMALE | Stage IIB  | T3  | MX | N0 |
| TCGA-MP-A5C7 | 2248 | 0 | 76     | FEMALE | Stage IB   | T2  | M0 | N0 |
| TCGA-75-6214 | 1115 | 1 | unknov | FEMALE | Stage IIIA | T2  | M0 | N2 |
| TCGA-NC-A5HQ | 448  | 1 | 70     | MALE   | Stage IIIA | T3  | M0 | N2 |
| TCGA-86-7713 | 1157 | 0 | 70     | MALE   | Stage IIA  | T2b | M0 | N0 |
| TCGA-60-2720 | 97   | 0 | 60     | FEMALE | Stage IB   | T2  | M0 | N0 |
| TCGA-75-6212 | 1516 | 1 | unknov | FEMALE | Stage IIB  | T2  | M0 | N1 |
| TCGA-62-8394 | 139  | 1 | 65     | FEMALE | Stage IIIB | T4  | M0 | N2 |
| TCGA-64-5778 | 1305 | 0 | 60     | MALE   | Stage IB   | T2  | M0 | N0 |
| TCGA-22-1017 | 1485 | 1 | 62     | MALE   | Stage IA   | T1  | M0 | N0 |
| TCGA-97-8174 | 164  | 1 | 67     | MALE   | Stage IIA  | T2b | M0 | N0 |
| TCGA-21-1082 | 3644 | 0 | 61     | MALE   | Stage IB   | T2  | M0 | N0 |
| TCGA-50-8459 | 1119 | 0 | 68     | MALE   | Stage IIB  | T3  | M0 | N0 |
| TCGA-50-8457 | 1125 | 0 | 63     | FEMALE | Stage IA   | T1a | M0 | N0 |
| TCGA-22-5477 | 1346 | 1 | 65     | MALE   | Stage IA   | T1  | M0 | N0 |
| TCGA-56-7223 | 442  | 1 | 66     | MALE   | Stage IIIA | T3  | MX | N1 |
| TCGA-43-8115 | 407  | 0 | 72     | FEMALE | Stage IIA  | T2a | MX | N1 |
| TCGA-97-A4M1 | 601  | 0 | 52     | FEMALE | Stage IA   | T1a | M0 | N0 |
| TCGA-85-A5B5 | 111  | 0 | 58     | MALE   | Stage IA   | T1b | M0 | N0 |
| TCGA-63-A5M9 | 0    | 0 | unknov | FEMALE | Stage IIB  | T2  | M0 | N1 |
| TCGA-78-7166 | 258  | 1 | 84     | MALE   | Stage IIB  | T2  | M0 | N1 |
| TCGA-83-5908 | 824  | 0 | 59     | FEMALE | Stage IA   | T1  | M0 | N0 |
| TCGA-56-5897 | 378  | 0 | 74     | MALE   | Stage IA   | T1b | MX | N0 |
| TCGA-77-7465 | 990  | 0 | 58     | MALE   | Stage IIA  | T2a | M0 | N1 |
| TCGA-L3-A524 | 490  | 1 | 45     | FEMALE | Stage IIB  | T3  | M0 | N0 |
| TCGA-05-4426 | 791  | 0 | 71     | MALE   | Stage IB   | T2  | M0 | N0 |
| TCGA-55-7995 | 889  | 0 | 73     | FEMALE | Stage IA   | T1b | M0 | N0 |
| TCGA-22-4601 | 1057 | 1 | 73     | FEMALE | Stage IIIA | T4  | M0 | N0 |
| TCGA-58-8393 | 1058 | 0 | 68     | FEMALE | Stage IB   | T2a | M0 | N0 |

|              |      |   |        |        |            |     |    |    |
|--------------|------|---|--------|--------|------------|-----|----|----|
| TCGA-68-8251 | 406  | 0 | 78     | MALE   | Stage IB   | T2a | M0 | N0 |
| TCGA-63-5131 |      | 1 | unknow | MALE   | Stage IIB  | T2  | M0 | N1 |
| TCGA-93-8067 | 186  | 0 | 77     | MALE   | Stage IB   | T2a | MX | N0 |
| TCGA-55-7284 | 243  | 1 | 74     | MALE   | Stage IIB  | T3  | MX | N0 |
| TCGA-55-1595 | 1479 | 0 | 74     | FEMALE | Stage IA   | T1  | M0 | N0 |
| TCGA-44-2655 | 1324 | 0 | 65     | FEMALE | Stage IA   | T1  | M0 | N0 |
| TCGA-22-4604 | 399  | 1 | 73     | MALE   | Stage IIA  | T2a | M0 | N1 |
| TCGA-69-8453 | 813  | 0 | 77     | MALE   | Stage IIB  | T3  | MX | N0 |
| TCGA-91-6835 | 79   | 0 | 81     | FEMALE | Stage IA   | T1  | M0 | N0 |
| TCGA-95-8039 | 830  | 0 | 72     | MALE   | Stage IA   | T1  | MX | N0 |
| TCGA-56-7579 | 951  | 1 | 61     | MALE   | Stage IIIA | T3  | M0 | N1 |
| TCGA-97-7938 | 18   | 1 | 76     | FEMALE | Stage IA   | T1a | MX | N0 |
| TCGA-69-7978 | 134  | 0 | 59     | MALE   | Stage IIB  | T2b | MX | N1 |
| TCGA-55-7994 | 603  | 0 | 81     | MALE   | Stage IIB  | T3  | MX | N0 |
| TCGA-55-8619 | 416  | 0 | 72     | FEMALE | Stage IIB  | T3  | MX | N0 |
| TCGA-78-7149 | 3940 | 0 | 71     | MALE   | Stage IIIB | T4  | M0 | N0 |
| TCGA-38-4631 | 354  | 1 | 72     | FEMALE | Stage IB   | T2  | M0 | N0 |
| TCGA-37-4132 | 227  | 0 | 61     | FEMALE | Stage IV   | T2  | M1 | N0 |
| TCGA-56-7580 | 925  | 0 | 84     | MALE   | Stage IB   | T2a | M0 | N0 |
| TCGA-77-A5GB | 0    | 1 | 90     | MALE   | Stage IB   | T2a | M0 | NX |
| TCGA-58-8391 | 2167 | 0 | 57     | FEMALE | Stage IIIA | T2  | M0 | N2 |
| TCGA-44-2662 | 1280 | 0 | 65     | MALE   | Stage IB   | T2  | M0 | N0 |
| TCGA-MP-A4SV | 2620 | 1 | 67     | MALE   | Stage IB   | T2  | M0 | N0 |
| TCGA-L9-A7SV | 565  | 0 | 69     | MALE   | Stage IIA  | T2a | M0 | N1 |
| TCGA-93-A4JQ | 526  | 0 | 49     | MALE   | Stage IA   | T1b | MX | N0 |
| TCGA-68-8250 | 244  | 0 | 66     | MALE   | Stage IA   | T1a | MX | N0 |
| TCGA-39-5024 | 2510 | 0 | 65     | FEMALE | Stage IIIA | T2a | M0 | N2 |
| TCGA-21-1071 | 1426 | 1 | 67     | MALE   | Stage IB   | T2  | M0 | N0 |
| TCGA-56-6545 | 666  | 0 | 77     | FEMALE | Stage IB   | T2a | M0 | N0 |
| TCGA-35-3615 | 14   | 0 | 57     | MALE   | Stage IB   | T2  | M0 | N0 |
| TCGA-96-A4JK | 589  | 0 | 65     | MALE   | Stage IIA  | T2a | M0 | N1 |
| TCGA-22-1011 | 53   | 1 | 73     | MALE   | Stage IB   | T2  | M0 | N0 |
| TCGA-05-4418 | 274  | 1 | 69     | MALE   | Stage IIIA | T3  | M0 | N2 |
| TCGA-21-5784 | 1268 | 0 | 80     | FEMALE | Stage IB   | T2  | M0 | N0 |
| TCGA-05-4249 | 1523 | 0 | 67     | MALE   | Stage IB   | T2  | M0 | N0 |
| TCGA-MN-A4N4 | 1175 | 0 | 57     | MALE   | Stage IA   | T1b | M0 | N0 |
| TCGA-43-6143 | 699  | 0 | 70     | MALE   | Stage IB   | T2  | M0 | N0 |
| TCGA-73-4658 | 1600 | 1 | 80     | FEMALE | Stage IB   | T2  | M0 | N0 |
| TCGA-44-A4SS | 415  | 0 | 73     | MALE   | Stage IA   | T1b | M0 | N0 |
| TCGA-95-A4VP | 605  | 0 | 66     | FEMALE | Stage IIIA | T2b | M0 | N2 |
| TCGA-O2-A52S | 387  | 1 | 57     | FEMALE | Stage III  | T4  | MX | N2 |
| TCGA-21-1075 | 2134 | 0 | 57     | MALE   | Stage IIB  | T2  | M0 | N1 |
| TCGA-55-7914 | 187  | 1 | 71     | FEMALE | Stage IIA  | T1b | MX | N1 |
| TCGA-78-7145 | 826  | 1 | 52     | FEMALE | Stage IV   | T4  | M1 | N1 |
| TCGA-55-8092 | 154  | 1 | 75     | MALE   | Stage IIB  | T3  | MX | N0 |
| TCGA-39-5028 | 52   | 1 | 75     | MALE   | Stage IIIA | T4  | M0 | N1 |
| TCGA-98-A53A | 552  | 1 | 70     | MALE   | Stage IB   | T2a | M0 | N0 |
| TCGA-34-5232 | 2471 | 0 | 75     | FEMALE | Stage IIA  | T1  | M0 | N1 |
| TCGA-MP-A4TE | 896  | 1 | 56     | MALE   | Stage IIA  | T2b | MX | N0 |
| TCGA-85-8071 | 815  | 0 | 52     | MALE   | Stage IIA  | T1a | M0 | N1 |
| TCGA-MP-A4T4 | 2617 | 1 | 68     | FEMALE | Stage IIB  | T2  | M0 | N1 |
| TCGA-66-2766 | 31   | 0 | 54     | MALE   | Stage IIIA | T2  | M0 | N2 |
| TCGA-55-8203 | 547  | 0 | 69     | FEMALE | Stage IA   | T1b | M0 | N0 |
| TCGA-55-6712 | 171  | 1 | 71     | MALE   | Stage IIA  | T2a | MX | N1 |
| TCGA-49-6743 | 1621 | 0 | 81     | FEMALE | Stage IIIA | T1  | MX | N2 |
| TCGA-56-A5DS | 8    | 0 | 72     | FEMALE | Stage IB   | T2a | MX | N0 |
| TCGA-NK-A5CX | 111  | 0 | 73     | MALE   | Stage IIA  | T2b | MX | N0 |
| TCGA-73-4668 | 467  | 0 | 66     | FEMALE | Stage IIB  | T2  | M0 | N1 |



|              |      |   |        |        |            |     |    |    |
|--------------|------|---|--------|--------|------------|-----|----|----|
| TCGA-39-5016 | 3850 | 0 | 44     | MALE   | Stage IIA  | T2a | M0 | N1 |
| TCGA-52-7622 | 862  | 0 | 62     | FEMALE | Stage IA   | T1a | M0 | N0 |
| TCGA-60-2721 | 983  | 0 | 73     | MALE   | Stage IB   | T2  | M0 | N0 |
| TCGA-22-4599 | 1161 | 1 | 73     | FEMALE | Stage IB   | T2a | M0 | N0 |
| TCGA-67-3770 | 610  | 0 | 70     | FEMALE | Stage IA   | T1  | M0 | N0 |
| TCGA-77-8154 | 1841 | 0 | 67     | MALE   | Stage IA   | T1  | M0 | N0 |
| TCGA-O2-A52N | 1006 | 1 | 78     | MALE   | Stage I    | T2  | MX | N0 |
| TCGA-66-2782 | 365  | 1 | 71     | MALE   | Stage IIB  | T3  | M0 | N0 |
| TCGA-22-1016 | 822  | 1 | 65     | MALE   | Stage IB   | T2  | M0 | N0 |
| TCGA-64-1680 | 1126 | 0 | 63     | MALE   | Stage IV   | T2a | M1 | N2 |
| TCGA-05-4398 | 1431 | 0 | 47     | FEMALE | Stage IIIB | T4  | M0 | N3 |
| TCGA-77-A5GH | 1182 | 0 | 81     | MALE   | Stage IB   | T2a | M0 | N0 |
| TCGA-78-7155 | 1171 | 1 | 68     | MALE   | Stage IB   | T2  | M0 | N0 |
| TCGA-77-7140 | 632  | 1 | 69     | FEMALE | Stage IIB  | T2  | M0 | N1 |
| TCGA-78-7152 | 1215 | 1 | 65     | MALE   | Stage IB   | T2  | M0 | N0 |
| TCGA-18-3419 | 2811 | 0 | 73     | MALE   | Stage IIB  | T2  | M0 | N1 |
| TCGA-75-6211 |      | 1 | unknov | FEMALE | Stage IB   | T2  | M0 | N0 |
| TCGA-22-5478 | 24   | 1 | 79     | MALE   | Stage IB   | T2a | M0 | N0 |
| TCGA-66-2734 | 1311 | 0 | 62     | FEMALE | Stage IB   | T2  | M0 | N0 |
| TCGA-18-3414 | 716  | 1 | 73     | MALE   | Stage IV   | T4  | M1 | N1 |
| TCGA-MP-A4T6 | 1790 | 1 | 76     | FEMALE | Stage IIIA | T1  | MX | N2 |
| TCGA-55-A57B | 546  | 0 | 80     | FEMALE | Stage IA   | T1b | M0 | N0 |
| TCGA-43-6773 | 116  | 1 | 76     | MALE   | Stage IIB  | T2  | MX | N1 |
| TCGA-44-2656 | 1429 | 0 | 59     | MALE   | Stage IB   | T2  | M0 | N0 |
| TCGA-21-1081 | 284  | 1 | 69     | MALE   | Stage IIB  | T2  | M0 | N1 |
| TCGA-93-A4JO | 33   | 1 | 70     | MALE   | Stage IA   | T1a | MX | N0 |
| TCGA-37-3792 | 12   | 0 | 69     | MALE   | Stage IB   | T2  | M0 | N0 |
| TCGA-NC-A5HH | 37   | 0 | 53     | MALE   | Stage IA   | T1  | M0 | N0 |
| TCGA-39-5019 | 3387 | 0 | 70     | MALE   | Stage IB   | T2a | M0 | N0 |
| TCGA-78-7535 | 949  | 1 | 45     | MALE   | Stage IB   | T2  | M0 | N0 |
| TCGA-62-8398 | 444  | 1 | 55     | MALE   | Stage IIIA | T2  | M0 | N2 |
| TCGA-91-6840 | 372  | 0 | 59     | FEMALE | Stage IA   | T1b | M0 | N0 |
| TCGA-75-5122 |      | 1 | unknov | MALE   | Stage IB   | T2  | M0 | N0 |
| TCGA-94-8490 | 153  | 0 | 70     | MALE   | Stage IIB  | T3  | M0 | N0 |
| TCGA-34-2609 | 951  | 1 | 81     | MALE   | Stage IIB  | T2  | M0 | N1 |
| TCGA-99-8025 | 1060 | 0 | 72     | FEMALE | Stage IIIA | T3  | M0 | N2 |
| TCGA-68-A59I | 492  | 0 | 73     | FEMALE | Stage IIIA | T3  | M0 | N1 |
| TCGA-37-4141 | 12   | 0 | 65     | FEMALE | Stage IA   | T1b | M0 | N0 |
| TCGA-34-2608 | 1000 | 1 | 84     | MALE   | Stage IB   | T2  | M0 | N0 |
| TCGA-55-8207 | 977  | 0 | 73     | MALE   | Stage IB   | T2a | MX | N0 |
| TCGA-60-2712 | 274  | 1 | 79     | FEMALE | Stage IIB  | T2  | M0 | N1 |
| TCGA-56-7222 | 562  | 1 | 60     | MALE   | Stage IB   | T2a | M0 | N0 |
| TCGA-55-6969 | 1239 | 0 | 52     | MALE   | Stage IB   | T2  | M0 | N0 |
| TCGA-77-A5G8 | 1884 | 0 | 70     | MALE   | Stage IIB  | T3  | M0 | N0 |
| TCGA-63-A5MY | 1052 | 0 | 63     | MALE   | Stage IA   | T1b | M0 | N0 |
| TCGA-66-2786 | 790  | 0 | 68     | FEMALE | Stage IA   | T1  | M0 | N0 |
| TCGA-77-8150 | 1655 | 1 | 64     | MALE   | Stage IIIA | T3  | M0 | N1 |
| TCGA-85-8351 | 510  | 0 | 72     | MALE   | Stage IIA  | T2a | M0 | N1 |
| TCGA-64-5774 | 2676 | 0 | 60     | MALE   | Stage IB   | T2  | M0 | N0 |
| TCGA-21-1078 | 474  | 1 | 77     | MALE   | Stage IB   | T2  | M0 | N0 |
| TCGA-94-7943 | 559  | 0 | 80     | MALE   | Stage IA   | T1b | MX | NX |
| TCGA-43-2578 | 684  | 1 | 59     | FEMALE | Stage IA   | T1  | M0 | N0 |
| TCGA-66-2763 | 30   | 0 | 63     | FEMALE | Stage IB   | T2  | M0 | N0 |
| TCGA-98-8021 | 937  | 0 | 75     | FEMALE | Stage IA   | T1a | M0 | N0 |
| TCGA-85-A4QR | 600  | 0 | 67     | MALE   | Stage IB   | T2a | M0 | N0 |
| TCGA-O1-A52J | 1798 | 1 | 74     | FEMALE | Stage IA   | T1  | MX | N0 |
| TCGA-33-AASJ | 3600 | 1 | 60     | MALE   | Stage IB   | T2  | MX | N0 |
| TCGA-22-1005 | 1953 | 1 | 63     | MALE   | Stage IA   | T1  | M0 | N0 |

|              |      |   |    |        |            |     |    |    |
|--------------|------|---|----|--------|------------|-----|----|----|
| TCGA-86-6851 | 179  | 0 | 73 | FEMALE | Stage IIA  | T1b | M0 | N1 |
| TCGA-62-8395 | 1216 | 0 | 80 | FEMALE | Stage IIB  | T3  | M0 | N0 |
| TCGA-22-5471 | 1845 | 0 | 75 | MALE   | Stage IB   | T2  | M0 | N0 |
| TCGA-77-8156 | 1106 | 0 | 60 | MALE   | Stage IB   | T2a | M0 | N0 |
| TCGA-39-5035 | 2080 | 0 | 72 | FEMALE | Stage IA   | T1b | M0 | N0 |
| TCGA-60-2710 | 2024 | 0 | 67 | FEMALE | Stage IIA  | T1  | M0 | N1 |
| TCGA-98-A538 | 826  | 0 | 67 | MALE   | Stage IIB  | T3  | M0 | N0 |
| TCGA-86-A4P7 | 415  | 0 | 63 | FEMALE | Stage IB   | T2a | M0 | N0 |
| TCGA-91-6831 | 310  | 0 | 66 | MALE   | Stage IB   | T2  | MX | N0 |
| TCGA-05-4420 | 912  | 0 | 41 | MALE   | Stage IB   | T2  | M0 | N0 |
| TCGA-58-8390 | 911  | 0 | 70 | MALE   | Stage IIA  | T2b | M0 | N0 |
| TCGA-05-4395 | 0    | 1 | 76 | MALE   | Stage IIIB | T4  | M0 | N2 |
| TCGA-67-6217 | 422  | 0 | 73 | FEMALE | Stage IIA  | T2a | M0 | N1 |
| TCGA-43-7656 | 596  | 0 | 71 | MALE   | Stage IA   | T1b | MX | N0 |
| TCGA-44-4112 | 808  | 1 | 60 | FEMALE | Stage IB   | T2a | M0 | N0 |
| TCGA-22-4591 | 623  | 1 | 80 | MALE   | Stage IIIA | T3  | M0 | N2 |
| TCGA-49-AAR2 | 2224 | 0 | 64 | MALE   | Stage IB   | T2  | MX | N0 |
| TCGA-37-A5EL | 1143 | 1 | 53 | MALE   | Stage IIB  | T3  | M0 | N0 |
| TCGA-77-8138 | 539  | 1 | 74 | MALE   | Stage IB   | T2  | M0 | N0 |
| TCGA-66-2744 | 30   | 0 | 71 | MALE   | Stage IIB  | T2  | M0 | N1 |
| TCGA-21-5787 | 329  | 1 | 65 | MALE   | Stage IIIA | T2  | M0 | N2 |
| TCGA-NK-A7XE | 13   | 0 | 66 | MALE   | Stage IIIB | T4  | M0 | N2 |
| TCGA-62-A46O | 1454 | 1 | 65 | FEMALE | Stage IB   | T2  | M0 | N0 |
| TCGA-44-7660 | 592  | 0 | 72 | MALE   | Stage IB   | T2  | MX | N0 |
| TCGA-34-5239 | 1834 | 0 | 75 | MALE   | Stage IIIA | T4  | M0 | N0 |
| TCGA-60-2716 | 1475 | 0 | 39 | MALE   | Stage IIB  | T2  | M0 | N1 |
| TCGA-60-2719 | 1297 | 0 | 83 | FEMALE | Stage IB   | T1  | M0 | N0 |
| TCGA-94-7557 | 5    | 1 | 73 | MALE   | Stage IB   | T2  | M0 | N0 |
| TCGA-44-3919 | 1026 | 1 | 71 | FEMALE | Stage IA   | T1  | M0 | N0 |
| TCGA-56-8305 | 105  | 0 | 72 | MALE   | Stage IB   | T2a | M0 | N0 |
| TCGA-44-6775 | 705  | 0 | 72 | FEMALE | Stage IB   | T2a | MX | N0 |
| TCGA-66-2742 | 641  | 0 | 70 | MALE   | Stage IV   | T2  | M1 | N1 |
| TCGA-97-7554 | 775  | 0 | 83 | FEMALE | Stage IIIA | T2a | M0 | N2 |
| TCGA-60-2713 | 1731 | 0 | 64 | MALE   | Stage IB   | T2  | M0 | N0 |
| TCGA-O2-A5IB | 340  | 1 | 71 | FEMALE | Stage III  | T3  | MX | N1 |
| TCGA-86-6562 | 376  | 1 | 52 | MALE   | Stage IIA  | T2a | M0 | N1 |
| TCGA-55-6642 | 2449 | 0 | 63 | MALE   | Stage IB   | T2  | MX | N0 |
| TCGA-43-8118 | 89   | 1 | 55 | FEMALE | Stage IA   | T1b | M0 | N0 |
| TCGA-LA-A7SW | 408  | 1 | 71 | MALE   | Stage IIIA | T3  | MX | N1 |
| TCGA-62-A471 | 1246 | 0 | 64 | MALE   | Stage IIB  | T2b | M0 | N1 |
| TCGA-63-A5ML | 1386 | 0 | 68 | MALE   | Stage IB   | T2  | M0 | N0 |
| TCGA-05-5715 | 62   | 0 | 69 | FEMALE | Stage IB   | T2a | M0 | N0 |
